# Supplementary material for: DNA methylation analysis of phenotype specific stratified Indian population
Source: PubMed Central journal article supplement (PMC4438459; doi:10.1186/s12967-015-0506-0), 2015-05-08
Supplement: 12967_2015_506_MOESM2_ESM.pdf [file 12967_2015_506_MOESM2_ESM.pdf]

**Table S2: Bisulfite Specific primers and PCR conditions**

| Gene Name                                               | Status                        | Primer Sequence                                                      | Chromosomal Coordinates     | PCR condition                                                                                                                                                                 |
|---------------------------------------------------------|-------------------------------|----------------------------------------------------------------------|-----------------------------|-------------------------------------------------------------------------------------------------------------------------------------------------------------------------------|
| <i>NNAT</i><br>(neuronatin)                             | Commonly Methylated           | FP- 5' ATTTATTAGGGTTTGGGGG 3'<br>RP- 5' ATCATCTACCCCATAAAACAAA 3'    | chr20:35,582,248-35,582,671 | Step1- 95 <sup>0</sup> C – 5'<br>Step2-95 <sup>0</sup> C – 30<br>60 <sup>0</sup> C – 1'<br>72 <sup>0</sup> C – 1.30'<br>Step2 for 35 Cycle<br>Step3-72 <sup>0</sup> C -10.00' |
| <i>LHX1</i><br>(LIM homeobox 1)                         | Vata Methylated               | FP- 5' AGTAGGAGGGGGTTTAGGTA 3'<br>RP- 5' TAAACTCTAAAAACCCCTC 3'      | chr17:32,367,978-32,368,193 | Step1- 95 <sup>0</sup> C – 5'<br>Step2-95 <sup>0</sup> C – 30<br>60 <sup>0</sup> C – 1'<br>72 <sup>0</sup> C – 1.30'<br>Step2 for 35 Cycle<br>Step3-72 <sup>0</sup> C -10.00' |
| <i>SOX11</i><br>(SRY (sex determining region Y)-box 11) | Pitta Methylated              | FP- 5' GGAGGTYGTYGTTTTAGGTT 3'<br>RP- 5' TTTAAAAAATCCRCRTATATACAC 3' | chr2:5,749,505-5,749,799    | Step1- 95 <sup>0</sup> C – 5'<br>Step2-95 <sup>0</sup> C – 30<br>57 <sup>0</sup> C – 1'<br>72 <sup>0</sup> C – 1.30'<br>Step2 for 35 Cycle<br>Step3-72 <sup>0</sup> C -10.00' |
| <i>CDH22</i><br>(cadherin 22)                           | Kapha and High BMI Methylated | FP- 5'GGTTGGGGTTTAGGAGTATG 3'<br>RP- 5'CTTCCCCRACTCTAAAACATC 3'      | chr20:44,313,355-44,313,655 | Step1- 95 <sup>0</sup> C – 5'<br>Step2-95 <sup>0</sup> C – 30<br>60 <sup>0</sup> C – 1'<br>72 <sup>0</sup> C – 1.30'<br>Step2 for 35 Cycle<br>Step3-72 <sup>0</sup> C -10.00' |
