# Supplementary material for: DNA methylation analysis of phenotype specific stratified Indian population
Source: PubMed Central journal article supplement (PMC4438459; doi:10.1186/s12967-015-0506-0), 2015-05-08
Supplement: 12967_2015_506_MOESM8_ESM.pdf [file 12967_2015_506_MOESM8_ESM.pdf]

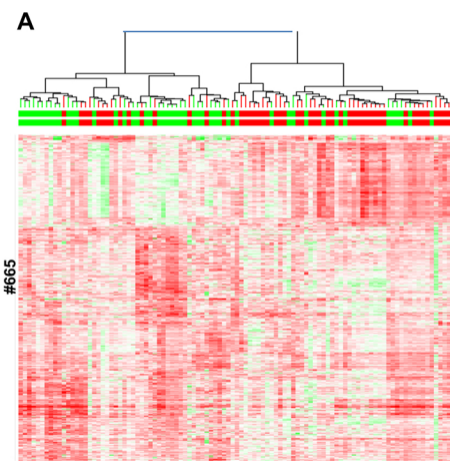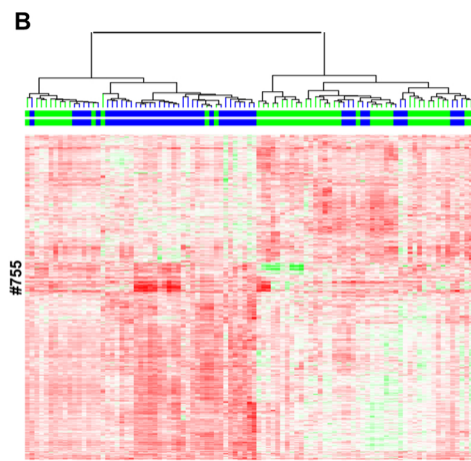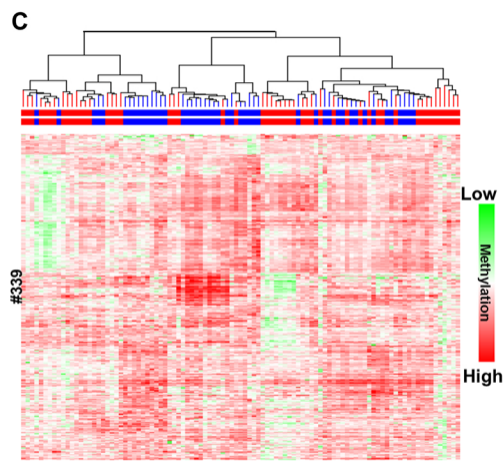

■ Kapha   ■ Pitta   ■ Vata

Low  
Methylation  
High
