# Supplementary material for: DNA methylation analysis of phenotype specific stratified Indian population
Source: PubMed Central journal article supplement (PMC4438459; doi:10.1186/s12967-015-0506-0), 2015-05-08
Supplement: 12967_2015_506_MOESM9_ESM.pdf [file 12967_2015_506_MOESM9_ESM.pdf]

**Table S2: List of 501mPSRs.**

| ProbeName      | p (Corr) | FC K vs P | FC V vs K | FC P vs V | Gene Symbol | Probe Coordinates         | CpG Island                | Prakriti More Methylated |
|----------------|----------|-----------|-----------|-----------|-------------|---------------------------|---------------------------|--------------------------|
| A_17_P00846129 | 0.14     | 1.36      | -1.78     | 1.31      |             | chr1:226741256-226741315  | chr1:226740969-226742375  | Kapha                    |
| A_17_P16504768 | 0.19     | 1.26      | -1.21     | -1.04     | CADM1       | chr11:114880191-114880235 | chr11:114878784-114881091 | Kapha                    |
| A_17_P07740806 | 0.15     | 1.49      | -1.39     | -1.07     | LMO2        | chr11:33848096-33848155   | #N/A                      | Kapha                    |
| A_17_P16475089 | 0.17     | 1.31      | -1.10     | -1.19     | WNT11       | chr11:75597316-75597360   | chr11:75596389-75599732   | Kapha                    |
| A_17_P08336158 | 0.14     | 1.33      | -1.01     | -1.32     | COL2A1      | chr12:46684852-46684896   | chr12:46684156-46684998   | Kapha                    |
| A_17_P09319924 | 0.19     | 1.29      | -1.08     | -1.19     | ACTR10      | chr14:57736659-57736703   | chr14:57736320-57736951   | Kapha                    |
| A_17_P09673912 | 0.17     | 1.52      | -1.25     | -1.21     | NEDD4       | chr15:54072461-54072520   | #N/A                      | Kapha                    |
| A_17_P09892937 | 0.14     | 1.29      | -1.05     | -1.23     | ZNF213      | chr16:3139573-3139622     | #N/A                      | Kapha                    |
| A_17_P15238970 | 0.14     | 1.27      | -1.15     | -1.11     | SIX3        | chr2:45023378-45023422    | chr2:45023009-45025388    | Kapha                    |
| A_17_P11119673 | 0.18     | 1.34      | -1.20     | -1.12     | NXT1        | chr20:23279261-23279305   | chr20:23278636-23280046   | Kapha                    |
| A_17_P11190515 | 0.16     | 1.21      | -1.27     | 1.05      | CDH22       | chr20:44313625-44313669   | chr20:44313106-44313695   | Kapha                    |
| A_17_P15621436 | 0.18     | 1.38      | -1.16     | -1.19     | GAB1        | chr4:144477270-144477314  | chr4:144476381-144477977  | Kapha                    |
| A_17_P03200932 | 0.18     | 1.82      | -1.21     | -1.51     | CNOT6L      | chr4:78958631-78958690    | #N/A                      | Kapha                    |
| A_17_P15754367 | 0.18     | 1.20      | -1.11     | -1.09     | HAND1       | chr5:153837838-153837882  | chr5:153837231-153839306  | Kapha                    |
| A_17_P15126949 | 0.15     | 1.24      | -1.02     | -1.22     | BOLA1       | chr1:148138518-148138562  | chr1:148137703-148138570  | Kapha                    |
| A_17_P15162325 | 0.11     | 1.21      | 1.01      | -1.21     | ARL8A       | chr1:200380701-200380746  | chr1:200379774-200380766  | Kapha                    |
| A_17_P00737825 | 0.20     | 1.39      | -1.04     | -1.33     | PRELP       | chr1:201723448-201723492  | chr1:201723407-201723682  | Kapha                    |
| A_17_P16910769 | 0.16     | 1.23      | -1.08     | -1.13     | FLJ11171    | chr16:69880674-69880718   | chr16:69880616-69881015   | Kapha                    |
| A_17_P10193689 | 0.15     | 1.23      | -1.04     | -1.19     | SMG6        | chr17:2153411-2153455     | chr17:2153267-2153998     | Kapha                    |
| A_17_P10310314 | 0.19     | 1.28      | 1.01      | -1.30     |             | chr17:33838495-33838539   | chr17:33837946-33838979   | Kapha                    |
| A_17_P17284236 | 0.17     | 1.24      | -1.07     | -1.16     | SYNGR1      | chr22:38076505-38076549   | chr22:38075929-38076580   | Kapha                    |
| A_17_P04299971 | 0.16     | 1.39      | -1.73     | 1.24      | H2AFY       | chr5:134762401-134762456  | chr5:134761995-134763160  | Kapha                    |
| A_17_P16119569 | 0.15     | 1.14      | -1.21     | 1.07      | STK3        | chr8:99906957-99907001    | chr8:99906637-99907112    | Kapha                    |
| A_17_P00001114 | 0.12     | -1.35     | 1.22      | 1.11      |             | chr1:1090371-1090416      | chr1:1087906-1090447      | Pitta                    |
| A_17_P15009603 | 0.17     | -1.43     | 1.19      | 1.20      | C1orf70     | chr1:1463095-1463139      | chr1:1462970-1463205      | Pitta                    |
| A_17_P00524032 | 0.12     | -1.37     | 1.20      | 1.14      | PKLR        | chr1:153530892-153530940  | #N/A                      | Pitta                    |
| A_17_P00530664 | 0.18     | -1.43     | 1.37      | 1.04      | PEAR1       | chr1:155145339-155145383  | #N/A                      | Pitta                    |
| A_17_P00543247 | 0.15     | -1.44     | 1.02      | 1.42      | IGSF9       | chr1:158166102-158166146  | chr1:158166056-158166477  | Pitta                    |
| A_17_P15138082 | 0.19     | -1.47     | 1.13      | 1.30      | UAP1        | chr1:160798275-160798319  | chr1:160797480-160798477  | Pitta                    |
| A_17_P00567027 | 0.11     | -1.43     | 1.09      | 1.31      | LMX1A       | chr1:163471724-163471774  | chr1:163471125-163472131  | Pitta                    |
| A_17_P15160669 | 0.12     | -1.23     | -1.01     | 1.24      | NR5A2       | chr1:198383747-198383791  | chr1:198383319-198383827  | Pitta                    |
| A_17_P00004298 | 0.18     | -1.24     | 1.15      | 1.08      | SKI         | chr1:2228551-2228599      | chr1:2226302-2228929      | Pitta                    |
| A_17_P15011753 | 0.15     | -1.26     | -1.02     | 1.29      | PEX10       | chr1:2333600-2333644      | chr1:2333245-2334577      | Pitta                    |
| A_17_P00928574 | 0.15     | -1.32     | -1.02     | 1.34      | ZNF496      | chr1:245530957-245531001  | chr1:245530471-245531333  | Pitta                    |
| A_17_P00933088 | 0.12     | -1.34     | 1.09      | 1.23      | ZNF672      | chr1:247108287-247108332  | chr1:247108186-247109419  | Pitta                    |
| A_17_P00933090 | 0.07     | -1.24     | -1.06     | 1.31      | ZNF672      | chr1:247108836-247108880  | chr1:247108186-247109419  | Pitta                    |

| ProbeName      | p (Corr) | FC K vs P | FC V vs K | FC P vs V | Gene Symbol | Probe Coordinates         | CpG Island                | Prakriti More Methylated |
|----------------|----------|-----------|-----------|-----------|-------------|---------------------------|---------------------------|--------------------------|
| A_17_P00096245 | 0.18     | -1.53     | 1.27      | 1.21      | RUNX3       | chr1:25130245-25130292    | chr1:25128114-25131592    | Pitta                    |
| A_17_P15015273 | 0.14     | -1.47     | 1.27      | 1.15      | MEGF6       | chr1:3490389-3490433      | #N/A                      | Pitta                    |
| A_17_P00166514 | 0.13     | -1.33     | -1.02     | 1.37      | TIE1        | chr1:43543507-43543552    | #N/A                      | Pitta                    |
| A_17_P15021110 | 0.10     | -1.19     | -1.08     | 1.29      | RERE        | chr1:8686037-8686081      | chr1:8685592-8686136      | Pitta                    |
| A_17_P15007146 | 0.18     | -1.33     | 1.10      | 1.21      | AGRN        | chr1:968669-968713        | chr1:965359-970168        | Pitta                    |
| A_17_P07424748 | 0.18     | -1.41     | 1.31      | 1.08      |             | chr10:101271423-101271467 | chr10:101271171-101272106 | Pitta                    |
| A_17_P07424753 | 0.15     | -1.33     | 1.03      | 1.29      |             | chr10:101271995-101272039 | chr10:101271171-101272106 | Pitta                    |
| A_17_P16293228 | 0.19     | -1.26     | 1.06      | 1.19      | FRMD4A      | chr10:13738976-13739020   | chr10:13738568-13739546   | Pitta                    |
| A_17_P07091300 | 0.13     | -1.62     | 1.21      | 1.34      | C10orf38    | chr10:15294762-15294810   | chr10:15294604-15294858   | Pitta                    |
| A_17_P16305236 | 0.13     | -1.23     | 1.11      | 1.11      | WAC         | chr10:28862311-28862355   | chr10:28861195-28863098   | Pitta                    |
| A_17_P07201551 | 0.17     | -1.35     | 1.04      | 1.30      | GDF10       | chr10:48049501-48049552   | #N/A                      | Pitta                    |
| A_17_P07997664 | 0.19     | -1.31     | 1.11      | 1.17      | DDI1        | chr11:103412884-103412928 | chr11:103412615-103413200 | Pitta                    |
| A_17_P07997665 | 0.19     | -1.39     | 1.12      | 1.24      | DDI1        | chr11:103412956-103413003 | chr11:103412615-103413200 | Pitta                    |
| A_17_P07594600 | 0.19     | -1.40     | 1.03      | 1.36      | PKP3        | chr11:390092-390136       | chr11:390096-390757       | Pitta                    |
| A_17_P07824609 | 0.08     | -1.54     | 1.00      | 1.54      |             | chr11:60171510-60171566   | #N/A                      | Pitta                    |
| A_17_P16459875 | 0.19     | -1.47     | 1.23      | 1.19      | RTN3        | chr11:63286681-63286732   | chr11:63286464-63288410   | Pitta                    |
| A_17_P07836887 | 0.18     | -1.36     | 1.20      | 1.14      | MACROD1     | chr11:63523032-63523076   | chr11:63522634-63525242   | Pitta                    |
| A_17_P16469119 | 0.19     | -1.19     | -1.17     | 1.40      | PPFIA1      | chr11:69794649-69794693   | chr11:69793885-69795145   | Pitta                    |
| A_17_P07880572 | 0.14     | -1.46     | 1.35      | 1.08      | FLJ33790    | chr11:74814331-74814378   | chr11:74814055-74814337   | Pitta                    |
| A_17_P08615336 | 0.14     | -1.33     | 1.12      | 1.19      | CUX2        | chr12:110232793-110232840 | #N/A                      | Pitta                    |
| A_17_P08615357 | 0.13     | -1.57     | 1.27      | 1.23      | CUX2        | chr12:110242856-110242900 | chr12:110242171-110242904 | Pitta                    |
| A_17_P16596446 | 0.12     | -1.07     | -1.32     | 1.41      | KIAA1853    | chr12:118076423-118076467 | chr12:118076239-118076559 | Pitta                    |
| A_17_P08656985 | 0.18     | -1.36     | 1.13      | 1.20      |             | chr12:120750022-120750068 | chr12:120749757-120750337 | Pitta                    |
| A_17_P08686329 | 0.09     | -1.75     | 1.17      | 1.50      | GLT1D1      | chr12:127995802-127995856 | #N/A                      | Pitta                    |
| A_17_P08152900 | 0.18     | -1.37     | 1.04      | 1.32      | CACNA2D4    | chr12:1844712-1844762     | chr12:1844000-1845219     | Pitta                    |
| A_17_P16523230 | 0.16     | -1.32     | 1.06      | 1.25      | CACNA2D4    | chr12:1844899-1844944     | chr12:1844000-1845219     | Pitta                    |
| A_17_P08375769 | 0.13     | -1.19     | -1.27     | 1.51      | NAB2        | chr12:55768480-55768524   | chr12:55767064-55769383   | Pitta                    |
| A_17_P08378773 | 0.16     | -1.31     | 1.16      | 1.13      | CENTG1      | chr12:56406914-56406958   | chr12:56406176-56407818   | Pitta                    |
| A_17_P09137227 | 0.16     | -1.28     | -1.01     | 1.30      |             | chr13:110543469-110543513 | chr13:110543494-110543698 | Pitta                    |
| A_17_P09145246 | 0.15     | -1.54     | 1.20      | 1.28      | ATP11A      | chr13:112473149-112473201 | #N/A                      | Pitta                    |
| A_17_P16673700 | 0.09     | -1.52     | 1.18      | 1.29      |             | chr13:112600395-112600450 | chr13:112600382-112600774 | Pitta                    |
| A_17_P16674248 | 0.08     | -1.24     | 1.11      | 1.11      | MCF2L       | chr13:112798471-112798515 | chr13:112798487-112799566 | Pitta                    |
| A_17_P08706322 | 0.09     | -1.42     | 1.13      | 1.26      |             | chr13:19290595-19290639   | chr13:19290430-19290707   | Pitta                    |
| A_17_P08708559 | 0.08     | -1.45     | 1.19      | 1.22      | CRYL1       | chr13:19887090-19887134   | chr13:19887007-19887836   | Pitta                    |
| A_17_P09520408 | 0.19     | -1.29     | 1.02      | 1.25      |             | chr14:101171025-101171069 | chr14:101170918-101171349 | Pitta                    |
| A_17_P09521535 | 0.12     | -1.50     | 1.26      | 1.20      | DYNC1H1     | chr14:101491870-101491922 | chr14:101491904-101492109 | Pitta                    |
| A_17_P09522590 | 0.13     | -1.44     | 1.16      | 1.24      | WDR20       | chr14:101750198-101750242 | chr14:101750040-101750272 | Pitta                    |

| ProbeName      | p (Corr) | FC K vs P | FC V vs K | FC P vs V | Gene Symbol | Probe Coordinates         | CpG Island                | Prakriti More Methylated |
|----------------|----------|-----------|-----------|-----------|-------------|---------------------------|---------------------------|--------------------------|
| A_17_P09523668 | 0.14     | -1.19     | -1.12     | 1.34      | ANKRD9      | chr14:102043809-102043853 | chr14:102043070-102046419 | Pitta                    |
| A_17_P09477529 | 0.17     | -1.17     | -1.04     | 1.22      | RIN3        | chr14:92224541-92224587   | #N/A                      | Pitta                    |
| A_17_P09546690 | 0.19     | -1.43     | 1.05      | 1.37      | ATP10A      | chr15:23532244-23532293   | chr15:23532269-23532485   | Pitta                    |
| A_17_P09556472 | 0.19     | -1.30     | -1.02     | 1.32      | OCA2        | chr15:25922652-25922696   | chr15:25922164-25922761   | Pitta                    |
| A_17_P16796512 | 0.15     | -1.30     | 1.23      | 1.06      |             | chr15:60303931-60303975   | chr15:60303616-60304097   | Pitta                    |
| A_17_P16813767 | 0.09     | -1.49     | -1.03     | 1.53      | MEX3B       | chr15:80126104-80126148   | chr15:80122527-80126992   | Pitta                    |
| A_17_P09926896 | 0.11     | -1.25     | 1.01      | 1.23      | CLEC16A     | chr16:11179857-11179902   | chr16:11179747-11180004   | Pitta                    |
| A_17_P09932325 | 0.10     | -1.31     | 1.15      | 1.14      | SNX29       | chr16:12570069-12570113   | chr16:12569863-12570178   | Pitta                    |
| A_17_P09885810 | 0.18     | -1.17     | -1.05     | 1.24      | BAIAP3      | chr16:1338140-1338184     | chr16:1337681-1338246     | Pitta                    |
| A_17_P09885980 | 0.15     | -1.46     | 1.35      | 1.09      | UNKL        | chr16:1375095-1375152     | #N/A                      | Pitta                    |
| A_17_P09886266 | 0.17     | -1.31     | 1.20      | 1.09      | CLCN7       | chr16:1447656-1447700     | #N/A                      | Pitta                    |
| A_17_P09886437 | 0.11     | -1.31     | 1.06      | 1.24      | TELO2       | chr16:1490627-1490671     | chr16:1490145-1490830     | Pitta                    |
| A_17_P09881541 | 0.05     | -1.47     | -1.01     | 1.48      | AXIN1       | chr16:350674-350718       | chr16:349985-351492       | Pitta                    |
| A_17_P09998228 | 0.13     | -1.35     | 1.12      | 1.20      |             | chr16:47088118-47088162   | chr16:47088036-47088310   | Pitta                    |
| A_17_P09900174 | 0.18     | -1.46     | 1.16      | 1.26      | PPL         | chr16:4873755-4873799     | chr16:4873624-4874564     | Pitta                    |
| A_17_P10041354 | 0.15     | -1.28     | -1.08     | 1.38      | ZNF319      | chr16:56588771-56588815   | chr16:56587715-56589134   | Pitta                    |
| A_17_P09882690 | 0.13     | -1.41     | 1.19      | 1.18      | RAB40C      | chr16:617462-617506       | chr16:617368-618129       | Pitta                    |
| A_17_P10117975 | 0.10     | -1.34     | 1.30      | 1.03      | CHST5       | chr16:74120671-74120715   | chr16:74120614-74121613   | Pitta                    |
| A_17_P16920147 | 0.13     | -1.46     | 1.09      | 1.34      | KCNG4       | chr16:82813985-82814030   | #N/A                      | Pitta                    |
| A_17_P10174435 | 0.08     | -1.36     | 1.22      | 1.11      | FBXO31      | chr16:85925280-85925324   | chr16:85925035-85925352   | Pitta                    |
| A_17_P16924284 | 0.17     | -1.22     | -1.03     | 1.25      |             | chr16:86142149-86142193   | chr16:86141860-86142211   | Pitta                    |
| A_17_P16926058 | 0.16     | -1.63     | 1.32      | 1.24      |             | chr16:86722181-86722240   | #N/A                      | Pitta                    |
| A_17_P10178215 | 0.16     | -1.36     | 1.10      | 1.23      | ZFPM1       | chr16:87067937-87067987   | chr16:87067361-87068033   | Pitta                    |
| A_17_P10178491 | 0.04     | -1.41     | -1.07     | 1.51      | ZFPM1       | chr16:87126578-87126622   | chr16:87125948-87126663   | Pitta                    |
| A_17_P09883933 | 0.16     | -1.50     | 1.20      | 1.24      | LMF1        | chr16:899622-899667       | #N/A                      | Pitta                    |
| A_17_P10256655 | 0.10     | -1.29     | 1.05      | 1.24      | RAI1        | chr17:17654371-17654415   | chr17:17653636-17655181   | Pitta                    |
| A_17_P10191987 | 0.18     | -1.26     | -1.04     | 1.31      | RTN4RL1     | chr17:1787236-1787280     | chr17:1786739-1787959     | Pitta                    |
| A_17_P16935789 | 0.11     | -1.38     | -1.05     | 1.44      | CLUH        | chr17:2548509-2548557     | chr17:2547725-2548730     | Pitta                    |
| A_17_P10284899 | 0.16     | -1.27     | -1.06     | 1.34      | COPRS       | chr17:27209925-27209969   | chr17:27209877-27210693   | Pitta                    |
| A_17_P10312245 | 0.19     | -1.48     | 1.13      | 1.31      | LASP1       | chr17:34328626-34328679   | #N/A                      | Pitta                    |
| A_17_P10490911 | 0.13     | -1.36     | 1.12      | 1.22      | KIAA1303    | chr17:76536609-76536653   | chr17:76536492-76536828   | Pitta                    |
| A_17_P10492548 | 0.12     | -1.30     | -1.12     | 1.45      | SLC38A10    | chr17:76870672-76870716   | chr17:76870555-76870918   | Pitta                    |
| A_17_P10495052 | 0.15     | -1.32     | 1.04      | 1.27      | FASN        | chr17:77630413-77630457   | chr17:77630012-77630763   | Pitta                    |
| A_17_P17029220 | 0.13     | -1.56     | 1.26      | 1.23      | FOXK2       | chr17:78152456-78152500   | chr17:78152314-78152739   | Pitta                    |
| A_17_P10499106 | 0.20     | -1.23     | -1.01     | 1.24      | B3GNTL1     | chr17:78609289-78609333   | #N/A                      | Pitta                    |
| A_17_P17040986 | 0.19     | -1.38     | 1.14      | 1.21      |             | chr18:12902276-12902320   | chr18:12901024-12902704   | Pitta                    |
| A_17_P10832406 | 0.18     | -1.23     | 1.19      | 1.04      | ZNF236      | chr18:72735973-72736017   | chr18:72735931-72736156   | Pitta                    |

| ProbeName      | p (Corr) | FC K vs P | FC V vs K | FC P vs V | Gene Symbol | Probe Coordinates        | CpG Island               | Prakriti More Methylated |
|----------------|----------|-----------|-----------|-----------|-------------|--------------------------|--------------------------|--------------------------|
| A_17_P10840518 | 0.18     | -1.27     | 1.05      | 1.21      |             | chr18:74224802-74224846  | chr18:74224600-74224914  | Pitta                    |
| A_17_P10844231 | 0.17     | -1.48     | 1.10      | 1.34      | SALL3       | chr18:74854933-74854977  | chr18:74852927-74856537  | Pitta                    |
| A_17_P10846177 | 0.17     | -1.22     | -1.02     | 1.24      | NFATC1      | chr18:75272140-75272184  | chr18:75271415-75272433  | Pitta                    |
| A_17_P17088715 | 0.10     | -1.34     | 1.12      | 1.20      | NFATC1      | chr18:75336811-75336855  | chr18:75334314-75337386  | Pitta                    |
| A_17_P10848549 | 0.15     | -1.31     | 1.21      | 1.09      | KCNG2       | chr18:75760613-75760657  | chr18:75759900-75760988  | Pitta                    |
| A_17_P17089734 | 0.08     | -1.28     | -1.05     | 1.34      | KCNG2       | chr18:75760694-75760738  | chr18:75759900-75760988  | Pitta                    |
| A_17_P10537274 | 0.18     | -1.35     | 1.14      | 1.18      |             | chr18:8649730-8649779    | #N/A                     | Pitta                    |
| A_17_P10537880 | 0.13     | -1.28     | 1.04      | 1.23      | KIAA0802    | chr18:8774459-8774503    | chr18:8774147-8774583    | Pitta                    |
| A_17_P10853675 | 0.18     | -1.21     | 1.01      | 1.20      | MUM1        | chr19:1328846-1328890    | chr19:1328844-1329266    | Pitta                    |
| A_17_P10890888 | 0.16     | -1.32     | 1.14      | 1.16      | NANOS3      | chr19:13845945-13845989  | #N/A                     | Pitta                    |
| A_17_P17112142 | 0.19     | -1.25     | -1.04     | 1.30      |             | chr19:14237746-14237790  | chr19:14237688-14237961  | Pitta                    |
| A_17_P10901468 | 0.11     | -1.25     | -1.01     | 1.27      | NR2F6       | chr19:17216338-17216382  | chr19:17216181-17217471  | Pitta                    |
| A_17_P17115989 | 0.16     | -1.26     | -1.01     | 1.27      | UNC13A      | chr19:17659722-17659766  | chr19:17659679-17660329  | Pitta                    |
| A_17_P10855914 | 0.20     | -1.31     | 1.02      | 1.28      | BTBD2       | chr19:1936899-1936943    | chr19:1936880-1937198    | Pitta                    |
| A_17_P10857699 | 0.19     | -1.14     | -1.13     | 1.28      | GNG7        | chr19:2462720-2462764    | chr19:2462392-2462782    | Pitta                    |
| A_17_P10859732 | 0.08     | -1.32     | -1.02     | 1.35      | NCLN        | chr19:3158985-3159029    | chr19:3158920-3159157    | Pitta                    |
| A_17_P10939464 | 0.20     | -1.36     | 1.25      | 1.09      | WDR88       | chr19:38315122-38315166  | #N/A                     | Pitta                    |
| A_17_P10950180 | 0.10     | -1.39     | 1.03      | 1.35      | TBCB        | chr19:41296433-41296485  | chr19:41296199-41298746  | Pitta                    |
| A_17_P17137904 | 0.09     | -1.31     | 1.09      | 1.19      | LRFN1       | chr19:44496639-44496684  | chr19:44496461-44497794  | Pitta                    |
| A_17_P17145805 | 0.17     | -1.30     | 1.23      | 1.05      | TEX101      | chr19:48604260-48604304  | chr19:48604007-48604475  | Pitta                    |
| A_17_P10969500 | 0.18     | -1.33     | 1.19      | 1.12      | IRGQ        | chr19:48788894-48788938  | chr19:48788063-48789348  | Pitta                    |
| A_17_P17101924 | 0.18     | -1.40     | 1.09      | 1.28      | SAFB2       | chr19:5544872-5544916    | chr19:5544709-5545194    | Pitta                    |
| A_17_P10867937 | 0.16     | -1.24     | 1.05      | 1.18      | DUS3L       | chr19:5736616-5736660    | chr19:5736399-5736819    | Pitta                    |
| A_17_P10868863 | 0.12     | -1.29     | 1.08      | 1.19      | RFX2        | chr19:5958853-5958897    | chr19:5958829-5959225    | Pitta                    |
| A_17_P17163205 | 0.20     | -1.20     | -1.07     | 1.28      | ZNF524      | chr19:60805908-60805952  | chr19:60805639-60806044  | Pitta                    |
| A_17_P17163242 | 0.20     | -1.36     | 1.01      | 1.35      | ZNF784      | chr19:60819883-60819927  | chr19:60817161-60819979  | Pitta                    |
| A_17_P11006756 | 0.19     | -1.39     | 1.36      | 1.03      | ZNF71       | chr19:61825981-61826025  | chr19:61824970-61825996  | Pitta                    |
| A_17_P10873676 | 0.08     | -1.47     | 1.21      | 1.21      | TRAPPC5     | chr19:7653481-7653525    | chr19:7651490-7653714    | Pitta                    |
| A_17_P10852207 | 0.19     | -1.34     | 1.15      | 1.16      | C19orf6     | chr19:962408-962452      | chr19:958551-963222      | Pitta                    |
| A_17_P17093236 | 0.09     | -1.31     | -1.04     | 1.37      | GRIN3B      | chr19:958681-958725      | chr19:958551-963222      | Pitta                    |
| A_17_P01384691 | 0.15     | -1.23     | -1.12     | 1.37      | NCK2        | chr2:105864115-105864159 | #N/A                     | Pitta                    |
| A_17_P15314342 | 0.15     | -1.37     | 1.09      | 1.26      |             | chr2:118333450-118333494 | chr2:118333045-118334633 | Pitta                    |
| A_17_P00940555 | 0.19     | -1.20     | -1.02     | 1.22      | TPO         | chr2:1523421-1523465     | chr2:1523279-1523496     | Pitta                    |
| A_17_P01868408 | 0.17     | -1.18     | -1.11     | 1.31      | ERBB4       | chr2:213110924-213110968 | chr2:213110425-213112112 | Pitta                    |
| A_17_P01990112 | 0.12     | -1.53     | 1.33      | 1.15      | RBM44       | chr2:238372531-238372579 | chr2:238371747-238372760 | Pitta                    |
| A_17_P02002024 | 0.18     | -1.14     | -1.15     | 1.31      |             | chr2:240911465-240911511 | #N/A                     | Pitta                    |
| A_17_P15242925 | 0.14     | -1.19     | -1.01     | 1.20      | NRXN1       | chr2:51108187-51108231   | chr2:51108026-51109002   | Pitta                    |

| Probe Name      | p (Corr) | FC K vs P | FC V vs K | FC P vs V | Gene Symbol | Probe Coordinates        | CpG Island               | Prakriti More Methylated |
|-----------------|----------|-----------|-----------|-----------|-------------|--------------------------|--------------------------|--------------------------|
| A_17_P00960791  | 0.13     | -1.29     | -1.01     | 1.31      | SOX11       | chr2:5749737-5749795     | chr2:5749492-5751659     | Pitta                    |
| A_17_P15250661  | 0.17     | -1.39     | -1.09     | 1.51      | SPRED2      | chr2:65511939-65511983   | chr2:65511272-65513490   | Pitta                    |
| A_17_P15290121  | 0.11     | -1.40     | 1.12      | 1.26      | ZAP70       | chr2:97706958-97707002   | chr2:97706829-97707391   | Pitta                    |
| A_17_P11110627  | 0.15     | -1.25     | 1.05      | 1.18      | NKX2-2      | chr20:21444544-21444588  | chr20:21433932-21444714  | Pitta                    |
| A_17_P111130647 | 0.18     | -1.44     | 1.03      | 1.39      | HM13        | chr20:29598662-29598714  | #N/A                     | Pitta                    |
| A_17_P11132298  | 0.18     | -1.30     | 1.20      | 1.09      | XKR7        | chr20:30048135-30048180  | chr20:30047981-30048439  | Pitta                    |
| A_17_P11182714  | 0.10     | -1.55     | 1.31      | 1.19      | JPH2        | chr20:42222597-42222647  | #N/A                     | Pitta                    |
| A_17_P11207731  | 0.07     | -1.45     | 1.14      | 1.27      | KCNG1       | chr20:49059951-49059995  | chr20:49059470-49060250  | Pitta                    |
| A_17_P11259427  | 0.09     | -1.53     | 1.15      | 1.33      | GTPBP5      | chr20:60214914-60214960  | #N/A                     | Pitta                    |
| A_17_P17212817  | 0.12     | -1.23     | -1.15     | 1.41      | NPBWR2      | chr20:62207925-62207969  | chr20:62207826-62208515  | Pitta                    |
| A_17_P11399818  | 0.12     | -1.30     | -1.00     | 1.30      | RIPK4       | chr21:42034331-42034375  | chr21:42033985-42035017  | Pitta                    |
| A_17_P11414026  | 0.19     | -1.43     | 1.11      | 1.29      | ITGB2       | chr21:45131072-45131117  | chr21:45130936-45131223  | Pitta                    |
| A_17_P11417076  | 0.11     | -1.22     | 1.10      | 1.10      | COL18A1     | chr21:45720186-45720230  | chr21:45719244-45720740  | Pitta                    |
| A_17_P11418747  | 0.18     | -1.44     | 1.33      | 1.08      | PCBP3       | chr21:46158437-46158481  | chr21:46158375-46158877  | Pitta                    |
| A_17_P17244824  | 0.13     | -1.42     | 1.20      | 1.19      | COL6A1      | chr21:46248236-46248280  | chr21:46246272-46248311  | Pitta                    |
| A_17_P11430476  | 0.07     | -1.39     | 1.13      | 1.23      | GP1BB       | chr22:18089382-18089426  | chr22:18089081-18095311  | Pitta                    |
| A_17_P17255881  | 0.20     | -1.29     | 1.12      | 1.15      | ARVCF       | chr22:18340472-18340516  | #N/A                     | Pitta                    |
| A_17_P11441809  | 0.16     | -1.33     | 1.21      | 1.09      | GNAZ        | chr22:21768363-21768407  | chr22:21767921-21768431  | Pitta                    |
| A_17_P11472834  | 0.07     | -1.49     | 1.23      | 1.21      | SMTN        | chr22:29830570-29830626  | chr22:29830396-29831239  | Pitta                    |
| A_17_P11532029  | 0.08     | -1.47     | -1.02     | 1.51      | CELSR1      | chr22:45238469-45238513  | chr22:45238279-45238893  | Pitta                    |
| A_17_P11549494  | 0.09     | -1.64     | 1.15      | 1.43      | PANX2       | chr22:48959791-48959835  | chr22:48957405-48960027  | Pitta                    |
| A_17_P11549581  | 0.06     | -1.24     | -1.08     | 1.34      | TRABD       | chr22:48975018-48975062  | chr22:48974834-48975168  | Pitta                    |
| A_17_P02066591  | 0.12     | -1.34     | 1.05      | 1.28      | IQSEC1      | chr3:12952631-12952675   | chr3:12951966-12953182   | Pitta                    |
| A_17_P15496120  | 0.15     | -1.26     | 1.01      | 1.25      | CHST2       | chr3:144323433-144323477 | chr3:144320572-144323525 | Pitta                    |
| A_17_P02813541  | 0.08     | -1.43     | 1.05      | 1.37      |             | chr3:182927687-182927731 | chr3:182927100-182927691 | Pitta                    |
| A_17_P15527670  | 0.18     | -1.28     | 1.00      | 1.27      | NCBP2       | chr3:198154058-198154102 | chr3:198153089-198154448 | Pitta                    |
| A_17_P02238805  | 0.18     | -1.17     | -1.08     | 1.26      | PPM1M       | chr3:52255066-52255110   | chr3:52254689-52255180   | Pitta                    |
| A_17_P03335750  | 0.19     | -1.30     | 1.11      | 1.17      | LEF1        | chr4:109308016-109308060 | chr4:109307196-109309856 | Pitta                    |
| A_17_P02888915  | 0.17     | -1.27     | -1.01     | 1.28      | CTBP1       | chr4:1209559-1209603     | chr4:1208943-1209718     | Pitta                    |
| A_17_P15532581  | 0.13     | -1.35     | 1.04      | 1.29      | CTBP1       | chr4:1231416-1231460     | chr4:1231412-1234111     | Pitta                    |
| A_17_P15619322  | 0.09     | -1.39     | -1.07     | 1.49      | CCRN4L      | chr4:140155994-140156038 | chr4:140155893-140156878 | Pitta                    |
| A_17_P15646178  | 0.10     | -1.24     | -1.18     | 1.46      |             | chr4:186285516-186285560 | chr4:186285535-186287214 | Pitta                    |
| A_17_P02897080  | 0.14     | -1.17     | -1.10     | 1.28      | RGS12       | chr4:3345745-3345789     | chr4:3345629-3345943     | Pitta                    |
| A_17_P03113335  | 0.15     | -1.13     | -1.07     | 1.21      | KIAA1211    | chr4:56876262-56876306   | chr4:56875714-56876904   | Pitta                    |
| A_17_P02910611  | 0.13     | -1.39     | 1.21      | 1.15      | TBC1D14     | chr4:6976398-6976442     | chr4:6976112-6976492     | Pitta                    |
| A_17_P03196043  | 0.18     | -1.38     | 1.20      | 1.15      | SHROOM3     | chr4:77881114-77881158   | chr4:77880473-77882108   | Pitta                    |
| A_17_P15584199  | 0.19     | -1.24     | 1.03      | 1.21      | CNOT6L      | chr4:78959593-78959637   | chr4:78958731-78960579   | Pitta                    |

| Probe Name     | p (Corr) | FC K vs P | FC V vs K | FC P vs V | Gene Symbol | Probe Coordinates        | CpG Island               | Prakriti More Methylated |
|----------------|----------|-----------|-----------|-----------|-------------|--------------------------|--------------------------|--------------------------|
| A_17_P03712024 | 0.09     | -1.21     | -1.15     | 1.39      | SLC12A7     | chr5:1113821-1113865     | #N/A                     | Pitta                    |
| A_17_P15752776 | 0.17     | -1.37     | 1.05      | 1.31      | TNIP1       | chr5:150440629-150440673 | chr5:150440279-150441057 | Pitta                    |
| A_17_P15755953 | 0.14     | -1.18     | -1.03     | 1.22      |             | chr5:157050279-157050323 | chr5:157049727-157050957 | Pitta                    |
| A_17_P04450856 | 0.16     | -1.30     | -1.01     | 1.31      |             | chr5:167889718-167889762 | chr5:167888797-167889949 | Pitta                    |
| A_17_P04483518 | 0.13     | -1.36     | 1.02      | 1.33      | ARL10       | chr5:175726163-175726207 | #N/A                     | Pitta                    |
| A_17_P04498479 | 0.15     | -1.30     | 1.10      | 1.18      | FLT4        | chr5:179981320-179981364 | chr5:179978395-179981503 | Pitta                    |
| A_17_P03716237 | 0.09     | -1.27     | 1.07      | 1.18      |             | chr5:2003748-2003792     | chr5:2003624-2003922     | Pitta                    |
| A_17_P03709970 | 0.16     | -1.31     | 1.18      | 1.11      | SLC9A3      | chr5:541437-541481       | chr5:541250-541710       | Pitta                    |
| A_17_P03710805 | 0.12     | -1.22     | -1.12     | 1.36      | TPPP        | chr5:715737-715781       | chr5:715283-716402       | Pitta                    |
| A_17_P15712789 | 0.19     | -1.18     | -1.04     | 1.23      | OTP         | chr5:76970756-76970800   | chr5:76970337-76971052   | Pitta                    |
| A_17_P05138648 | 0.15     | -1.31     | 1.11      | 1.17      | STX11       | chr6:144549992-144550036 | chr6:144549519-144550390 | Pitta                    |
| A_17_P15869463 | 0.10     | -1.66     | 1.09      | 1.52      | STX11       | chr6:144550181-144550225 | chr6:144549519-144550390 | Pitta                    |
| A_17_P05196806 | 0.16     | -1.24     | -1.04     | 1.29      |             | chr6:156993826-156993870 | chr6:156993848-156994138 | Pitta                    |
| A_17_P05207112 | 0.10     | -1.28     | -1.09     | 1.39      | FNDC1       | chr6:159574383-159574427 | chr6:159573223-159575387 | Pitta                    |
| A_17_P05225506 | 0.19     | -1.39     | 1.26      | 1.10      | PACRG       | chr6:163490524-163490568 | chr6:163490152-163490804 | Pitta                    |
| A_17_P05229467 | 0.14     | -1.30     | 1.08      | 1.21      |             | chr6:164175647-164175692 | chr6:164175440-164176052 | Pitta                    |
| A_17_P15893756 | 0.14     | -1.43     | 1.14      | 1.25      |             | chr6:169166539-169166583 | chr6:169166157-169167446 | Pitta                    |
| A_17_P15895099 | 0.10     | -1.53     | 1.27      | 1.21      |             | chr6:170407093-170407142 | #N/A                     | Pitta                    |
| A_17_P15791645 | 0.11     | -1.21     | 1.01      | 1.21      | HDGFL1      | chr6:22678025-22678069   | chr6:22677563-22678684   | Pitta                    |
| A_17_P04666282 | 0.18     | -1.39     | 1.07      | 1.29      | PII6        | chr6:37035262-37035314   | #N/A                     | Pitta                    |
| A_17_P04700837 | 0.15     | -1.28     | 1.21      | 1.06      | NFKBIE      | chr6:44351348-44351392   | chr6:44351063-44352459   | Pitta                    |
| A_17_P04534649 | 0.15     | -1.35     | -1.04     | 1.40      | RREB1       | chr6:7192294-7192341     | chr6:7191664-7192571     | Pitta                    |
| A_17_P05653226 | 0.18     | -1.58     | 1.19      | 1.33      | CUX1        | chr7:101678400-101678448 | chr7:101678385-101679354 | Pitta                    |
| A_17_P05262329 | 0.09     | -1.44     | 1.31      | 1.10      |             | chr7:1337053-1337109     | chr7:1336912-1337389     | Pitta                    |
| A_17_P05864221 | 0.06     | -1.40     | 1.05      | 1.33      | ZNF425      | chr7:148433011-148433055 | #N/A                     | Pitta                    |
| A_17_P05864622 | 0.10     | -1.36     | 1.12      | 1.21      | ZNF282      | chr7:148552292-148552336 | chr7:148551954-148552770 | Pitta                    |
| A_17_P05864623 | 0.20     | -1.41     | 1.08      | 1.30      | ZNF282      | chr7:148552376-148552420 | chr7:148551954-148552770 | Pitta                    |
| A_17_P05864921 | 0.18     | -1.30     | 1.11      | 1.18      | ZNF783      | chr7:148622813-148622857 | chr7:148622588-148623114 | Pitta                    |
| A_17_P05263201 | 0.18     | -1.29     | 1.10      | 1.17      | TMEM184A    | chr7:1553963-1554007     | chr7:1553766-1554219     | Pitta                    |
| A_17_P05410823 | 0.18     | -1.20     | 1.05      | 1.15      | BMPER       | chr7:34085275-34085319   | chr7:34084988-34085284   | Pitta                    |
| A_17_P05480876 | 0.16     | -1.43     | 1.10      | 1.30      |             | chr7:50169259-50169313   | #N/A                     | Pitta                    |
| A_17_P15905115 | 0.12     | -1.42     | 1.06      | 1.33      | TNRC18      | chr7:5367932-5367976     | chr7:5367137-5368136     | Pitta                    |
| A_17_P05280895 | 0.20     | -1.21     | -1.10     | 1.34      | DAGLB       | chr7:6453899-6453943     | chr7:6453831-6454275     | Pitta                    |
| A_17_P15898198 | 0.07     | -1.49     | 1.23      | 1.22      | C7orf20     | chr7:902065-902109       | chr7:901557-902174       | Pitta                    |
| A_17_P06533874 | 0.15     | -1.34     | -1.00     | 1.35      | FAM83H      | chr8:144880329-144880373 | chr8:144880209-144882966 | Pitta                    |
| A_17_P16148040 | 0.08     | -1.28     | 1.15      | 1.11      | PARP10      | chr8:145123956-145124000 | chr8:145119281-145124293 | Pitta                    |
| A_17_P16054821 | 0.11     | -1.24     | -1.01     | 1.25      | DLGAP2      | chr8:1484630-1484674     | chr8:1484138-1485291     | Pitta                    |
| A_17_P06095117 | 0.06     | -1.59     | 1.28      | 1.25      | SLC20A2     | chr8:42413874-42413918   | chr8:42413667-42414216   | Pitta                    |

| Probe Name     | p (Corr) | FC K vs P | FC V vs K | FC P vs V | Gene Symbol | Probe Coordinates         | CpG Island                | Prakriti More Methylated |
|----------------|----------|-----------|-----------|-----------|-------------|---------------------------|---------------------------|--------------------------|
| A_17_P16097951 | 0.13     | -1.31     | -1.07     | 1.41      | FAM110B     | chr8:59221602-59221646    | chr8:59220721-59221968    | Pitta                    |
| A_17_P16066643 | 0.18     | -1.55     | 1.47      | 1.05      | CLDN23      | chr8:8598063-8598107      | chr8:8596541-8598277      | Pitta                    |
| A_17_P06946485 | 0.10     | -1.38     | 1.25      | 1.10      | LHX6        | chr9:124028917-124028961  | chr9:124027564-124030907  | Pitta                    |
| A_17_P06993482 | 0.18     | -1.38     | 1.08      | 1.27      | ABO         | chr9:135121351-135121395  | chr9:135120822-135121652  | Pitta                    |
| A_17_P07008897 | 0.12     | -1.21     | -1.02     | 1.24      | C9orf163    | chr9:138497957-138498001  | chr9:138496931-138498995  | Pitta                    |
| A_17_P07011231 | 0.18     | -1.24     | -1.05     | 1.30      | C9orf139    | chr9:139032130-139032174  | chr9:139031330-139032607  | Pitta                    |
| A_17_P07012367 | 0.15     | -1.14     | -1.10     | 1.26      | TOR4A       | chr9:139293731-139293775  | chr9:139292434-139295926  | Pitta                    |
| A_17_P06550494 | 0.14     | -1.26     | 1.05      | 1.21      | KCNV2       | chr9:2708646-2708690      | chr9:2707903-2708953      | Pitta                    |
| A_17_P06694132 | 0.19     | -1.35     | 1.22      | 1.11      | FAM219A     | chr9:34390785-34390837    | #N/A                      | Pitta                    |
| A_17_P16175582 | 0.18     | -1.31     | 1.05      | 1.25      | PAX5        | chr9:37027000-37027044    | chr9:37024135-37028341    | Pitta                    |
| A_17_P06832275 | 0.18     | -1.32     | 1.15      | 1.15      |             | chr9:97586849-97586893    | #N/A                      | Pitta                    |
| A_17_P15000032 | 0.11     | -1.31     | 1.06      | 1.25      | PPP2R3B     | chrX:225449-225493        | chrX:221585-228671        | Pitta                    |
| A_17_P17419852 | 0.18     | -1.29     | -1.02     | 1.31      | PPP2R3B     | chrX:231389-231433        | chrX:231035-232001        | Pitta                    |
| A_17_P17419854 | 0.18     | -1.35     | 1.04      | 1.31      | PPP2R3B     | chrX:231556-231600        | chrX:231035-232001        | Pitta                    |
| A_17_P17419896 | 0.11     | -1.20     | -1.10     | 1.32      | PPP2R3B     | chrX:238903-238947        | chrX:238668-239872        | Pitta                    |
| A_17_P17419900 | 0.07     | -1.41     | 1.07      | 1.32      | PPP2R3B     | chrX:239206-239250        | chrX:238668-239872        | Pitta                    |
| A_17_P15007885 | 0.09     | -1.30     | -1.04     | 1.34      | SDF4        | chr1:1153635-1153679      | chr1:1153365-1153758      | Pitta                    |
| A_17_P00002704 | 0.13     | -1.44     | 1.09      | 1.32      | KIAA1751    | chr1:1876477-1876524      | chr1:1876228-1876730      | Pitta                    |
| A_17_P15169007 | 0.12     | -1.23     | -1.09     | 1.35      |             | chr1:206199428-206199472  | chr1:206198950-206199740  | Pitta                    |
| A_17_P15176882 | 0.15     | -1.32     | 1.21      | 1.09      |             | chr1:219135440-219135484  | chr1:219135405-219135782  | Pitta                    |
| A_17_P00932638 | 0.09     | -1.35     | 1.09      | 1.24      | OR5BU1      | chr1:246921821-246921865  | chr1:246921653-246922093  | Pitta                    |
| A_17_P00105407 | 0.18     | -1.23     | 1.05      | 1.17      | AHDC1       | chr1:27747150-27747194    | chr1:27747004-27747225    | Pitta                    |
| A_17_P00011630 | 0.16     | -1.24     | -1.11     | 1.38      | TP73        | chr1:3624691-3624735      | chr1:3624493-3624961      | Pitta                    |
| A_17_P00022928 | 0.16     | -1.16     | -1.07     | 1.24      | RNF207      | chr1:6191529-6191573      | chr1:6191417-6192175      | Pitta                    |
| A_17_P07509808 | 0.12     | -1.29     | -1.07     | 1.38      | VAX1        | chr10:118875778-118875822 | chr10:118875555-118875874 | Pitta                    |
| A_17_P08126709 | 0.14     | -1.45     | 1.23      | 1.18      | HNT         | chr11:131066329-131066374 | chr11:131066147-131066823 | Pitta                    |
| A_17_P16440976 | 0.13     | -1.30     | 1.06      | 1.23      | PRDM11      | chr11:45190895-45190939   | chr11:45190798-45191004   | Pitta                    |
| A_17_P16472903 | 0.10     | -1.35     | -1.02     | 1.38      | P2RY2       | chr11:72623864-72623910   | chr11:72622927-72623876   | Pitta                    |
| A_17_P07596156 | 0.19     | -1.52     | 1.19      | 1.28      | PNPLA2      | chr11:814167-814211       | chr11:813556-814878       | Pitta                    |
| A_17_P16675768 | 0.15     | -1.24     | -1.18     | 1.47      | RASA3       | chr13:113785144-113785188 | chr13:113784812-113785325 | Pitta                    |
| A_17_P16620214 | 0.12     | -1.29     | -1.02     | 1.31      | ATP8A2      | chr13:25484386-25484430   | chr13:25484287-25484761   | Pitta                    |
| A_17_P08800927 | 0.18     | -1.56     | 1.28      | 1.21      |             | chr13:40007650-40007700   | chr13:40007489-40007748   | Pitta                    |
| A_17_P09532891 | 0.14     | -1.22     | -1.11     | 1.36      | AKT1        | chr14:104339605-104339649 | chr14:104339530-104339808 | Pitta                    |
| A_17_P09765013 | 0.18     | -1.34     | 1.18      | 1.14      | CSPG4       | chr15:73767245-73767289   | chr15:73766984-73767451   | Pitta                    |
| A_17_P09867028 | 0.20     | -1.26     | 1.12      | 1.13      | IGF1R       | chr15:97252312-97252356   | chr15:97252088-97252436   | Pitta                    |
| A_17_P09886209 | 0.07     | -1.26     | -1.00     | 1.27      | CLCN7       | chr16:1437880-1437924     | chr16:1437451-1437938     | Pitta                    |
| A_17_P09892884 | 0.07     | -1.34     | -1.05     | 1.42      | ZNF213      | chr16:3130994-3131038     | chr16:3130766-3131390     | Pitta                    |
| A_17_P10101968 | 0.04     | -1.57     | 1.28      | 1.22      | ZNF821      | chr16:70451853-70451897   | chr16:70451608-70451895   | Pitta                    |

| Probe Name     | p (Corr) | FC K vs P | FC V vs K | FC P vs V | Gene Symbol | Probe Coordinates        | CpG Island               | Prakriti More Methylated |
|----------------|----------|-----------|-----------|-----------|-------------|--------------------------|--------------------------|--------------------------|
| A_17_P10116687 | 0.19     | -1.48     | 1.10      | 1.35      | LDHD        | chr16:73706206-73706250  | chr16:73705899-73706365  | Pitta                    |
| A_17_P10183796 | 0.14     | -1.35     | 1.22      | 1.11      | CDK10       | chr16:88288626-88288670  | chr16:88288517-88288719  | Pitta                    |
| A_17_P10184743 | 0.17     | -1.21     | 1.13      | 1.07      | MC1R        | chr16:88513680-88513724  | chr16:88513414-88513857  | Pitta                    |
| A_17_P16955656 | 0.15     | -1.26     | 1.03      | 1.22      | B9D1        | chr17:19188414-19188458  | chr17:19188378-19188662  | Pitta                    |
| A_17_P10301478 | 0.19     | -1.22     | 1.23      | -1.01     | RASL10B     | chr17:31086492-31086536  | chr17:31086281-31086526  | Pitta                    |
| A_17_P16994403 | 0.14     | -1.18     | -1.04     | 1.23      |             | chr17:45334458-45334502  | chr17:45334464-45334739  | Pitta                    |
| A_17_P10494722 | 0.07     | -1.22     | -1.11     | 1.35      | ASPSCR1     | chr17:77560292-77560336  | chr17:77560143-77560427  | Pitta                    |
| A_17_P10498050 | 0.16     | -1.32     | 1.03      | 1.28      | TBCD        | chr17:78366186-78366230  | chr17:78366081-78366292  | Pitta                    |
| A_17_P17066943 | 0.20     | -1.30     | -1.05     | 1.36      |             | chr18:44756486-44756530  | chr18:44755622-44756974  | Pitta                    |
| A_17_P17088496 | 0.14     | -1.24     | -1.03     | 1.28      | NFATC1      | chr18:75272864-75272908  | chr18:75272692-75273106  | Pitta                    |
| A_17_P10884206 | 0.13     | -1.40     | 1.24      | 1.13      | LPPR2       | chr19:11334118-11334162  | chr19:11334094-11334354  | Pitta                    |
| A_17_P17094493 | 0.11     | -1.54     | 1.27      | 1.22      | NDUFS7      | chr19:1344235-1344279    | chr19:1344155-1344470    | Pitta                    |
| A_17_P17094854 | 0.16     | -1.24     | -1.06     | 1.32      | REEP6       | chr19:1447362-1447406    | chr19:1447346-1447681    | Pitta                    |
| A_17_P10855796 | 0.11     | -1.27     | 1.13      | 1.13      | C19orf34    | chr19:1904943-1904987    | chr19:1904778-1905023    | Pitta                    |
| A_17_P10855834 | 0.20     | -1.29     | 1.00      | 1.28      | C19orf34    | chr19:1912125-1912169    | chr19:1912001-1912325    | Pitta                    |
| A_17_P10856369 | 0.15     | -1.18     | -1.07     | 1.26      | AP3D1       | chr19:2071941-2071985    | chr19:2071873-2072167    | Pitta                    |
| A_17_P10860755 | 0.17     | -1.27     | 1.00      | 1.27      | C19orf28    | chr19:3497112-3497156    | chr19:3497144-3497382    | Pitta                    |
| A_17_P10861671 | 0.09     | -1.41     | 1.17      | 1.21      | ZFR2        | chr19:3773121-3773165    | chr19:3772974-3773278    | Pitta                    |
| A_17_P17133363 | 0.18     | -1.48     | 1.20      | 1.24      | LGI4        | chr19:40309081-40309125  | chr19:40309093-40309480  | Pitta                    |
| A_17_P10947254 | 0.11     | -1.54     | 1.11      | 1.38      | MAG         | chr19:40492729-40492773  | chr19:40492558-40492871  | Pitta                    |
| A_17_P17099961 | 0.13     | -1.22     | 1.07      | 1.14      | MAP2K2      | chr19:4053366-4053410    | chr19:4053299-4054041    | Pitta                    |
| A_17_P17100106 | 0.07     | -1.31     | 1.13      | 1.16      | ANKRD24     | chr19:4169026-4169070    | chr19:4168518-4169068    | Pitta                    |
| A_17_P10975602 | 0.15     | -1.30     | 1.01      | 1.29      | FBXO46      | chr19:50928372-50928416  | chr19:50928268-50928797  | Pitta                    |
| A_17_P17150377 | 0.18     | -1.29     | 1.09      | 1.19      | GLTSCR1     | chr19:52897218-52897262  | chr19:52896341-52897588  | Pitta                    |
| A_17_P10997510 | 0.09     | -1.17     | -1.13     | 1.31      | BIRC8       | chr19:58486423-58486467  | chr19:58486223-58486544  | Pitta                    |
| A_17_P10871051 | 0.13     | -1.59     | 1.04      | 1.53      | TRIP10      | chr19:6697135-6697179    | chr19:6697023-6697292    | Pitta                    |
| A_17_P10876473 | 0.09     | -1.28     | 1.13      | 1.13      | ADAMTS10    | chr19:8567234-8567278    | chr19:8567080-8567287    | Pitta                    |
| A_17_P15309826 | 0.12     | -1.14     | -1.17     | 1.33      | PSD4        | chr2:113673434-113673478 | chr2:113672814-113673513 | Pitta                    |
| A_17_P01440558 | 0.14     | -1.30     | -1.05     | 1.37      |             | chr2:121215917-121215961 | chr2:121215698-121216048 | Pitta                    |
| A_17_P01471357 | 0.13     | -1.29     | 1.24      | 1.04      | UGCG1       | chr2:128565533-128565577 | chr2:128565133-128565680 | Pitta                    |
| A_17_P15387418 | 0.14     | -1.27     | 1.18      | 1.07      | AP1S3       | chr2:224410872-224410916 | chr2:224410206-224411034 | Pitta                    |
| A_17_P15227294 | 0.14     | -1.33     | 1.04      | 1.27      |             | chr2:26249877-26249921   | chr2:26249606-26250708   | Pitta                    |
| A_17_P01313303 | 0.13     | -1.56     | 1.25      | 1.25      |             | chr2:81547830-81547874   | chr2:81547833-81548192   | Pitta                    |
| A_17_P11199158 | 0.05     | -1.41     | 1.17      | 1.21      | PREX1       | chr20:46686588-46686632  | chr20:46686341-46686625  | Pitta                    |
| A_17_P17203741 | 0.08     | -1.49     | 1.17      | 1.27      | APCDD1L     | chr20:56474833-56474877  | chr20:56474855-56475072  | Pitta                    |
| A_17_P11261936 | 0.15     | -1.07     | -1.17     | 1.26      | NTSR1       | chr20:60810690-60810734  | chr20:60810303-60811665  | Pitta                    |
| A_17_P17209347 | 0.10     | -1.55     | 1.03      | 1.51      | COL9A3      | chr20:60942504-60942556  | chr20:60942348-60942701  | Pitta                    |
| A_17_P11265853 | 0.18     | -1.44     | 1.25      | 1.14      | KCNQ2       | chr20:61555158-61555202  | chr20:61554911-61555347  | Pitta                    |



| Probe Name     | p (Corr) | FC K vs P | FC V vs K | FC P vs V | Gene Symbol   | Probe Coordinates        | CpG Island               | Prakriti More Methylated |
|----------------|----------|-----------|-----------|-----------|---------------|--------------------------|--------------------------|--------------------------|
| A_17_P11420951 | 0.14     | -1.38     | 1.20      | 1.14      | PCNT          | chr21:46673458-46673502  | chr21:46673477-46673818  | Pitta                    |
| A_17_P17288601 | 0.13     | -1.34     | 1.10      | 1.22      | SCUBE1        | chr22:41953592-41953636  | chr22:41953312-41953611  | Pitta                    |
| A_17_P11531748 | 0.16     | -1.40     | 1.08      | 1.29      | CELSR1        | chr22:45184339-45184386  | chr22:45184277-45184670  | Pitta                    |
| A_17_P17297392 | 0.11     | -1.26     | 1.02      | 1.23      | BRD1          | chr22:48555592-48555636  | chr22:48555616-48555868  | Pitta                    |
| A_17_P02880906 | 0.16     | -1.11     | -1.15     | 1.28      | PIGZ          | chr3:198180526-198180570 | chr3:198179713-198181459 | Pitta                    |
| A_17_P15434112 | 0.10     | -1.25     | 1.00      | 1.25      | TESSP5        | chr3:46767452-46767496   | chr3:46766865-46767522   | Pitta                    |
| A_17_P02915134 | 0.17     | -1.29     | 1.00      | 1.29      | AFAP1         | chr4:7825426-7825470     | chr4:7825395-7825669     | Pitta                    |
| A_17_P15730885 | 0.15     | -1.04     | -1.22     | 1.27      | STAR4         | chr5:110875974-110876018 | chr5:110875719-110876344 | Pitta                    |
| A_17_P15655103 | 0.09     | -1.47     | 1.04      | 1.41      | SLC12A7       | chr5:1138478-1138522     | chr5:1138140-1138847     | Pitta                    |
| A_17_P04488388 | 0.11     | -1.26     | 1.01      | 1.25      | B4GALT<br>7   | chr5:176964086-176964130 | chr5:176963771-176964190 | Pitta                    |
| A_17_P04496675 | 0.18     | -1.50     | 1.12      | 1.33      | RASGEF<br>1C  | chr5:179496008-179496052 | chr5:179495805-179496385 | Pitta                    |
| A_17_P15893891 | 0.18     | -1.25     | 1.02      | 1.23      |               | chr6:169281836-169281880 | chr6:169281426-169281958 | Pitta                    |
| A_17_P05257546 | 0.17     | -1.25     | 1.08      | 1.16      | DLL1          | chr6:170434759-170434803 | chr6:170434309-170435004 | Pitta                    |
| A_17_P15839073 | 0.19     | -1.15     | -1.09     | 1.25      | GJA10         | chr6:90654067-90654111   | chr6:90653928-90654374   | Pitta                    |
| A_17_P05647941 | 0.20     | -1.08     | -1.12     | 1.21      | POP7          | chr7:100141117-100141161 | chr7:100140950-100142015 | Pitta                    |
| A_17_P05884923 | 0.09     | -1.55     | 1.27      | 1.22      | DPP6          | chr7:154315500-154315544 | chr7:154315335-154315563 | Pitta                    |
| A_17_P05899392 | 0.19     | -1.35     | 1.06      | 1.27      | PTPRN2        | chr7:157260939-157260983 | chr7:157260924-157261165 | Pitta                    |
| A_17_P05277806 | 0.16     | -1.39     | 1.33      | 1.04      | TNRC18        | chr7:5380242-5380286     | chr7:5380271-5380736     | Pitta                    |
| A_17_P06529446 | 0.13     | -1.34     | 1.05      | 1.28      | BAI1          | chr8:143606456-143606500 | chr8:143606380-143606604 | Pitta                    |
| A_17_P06532403 | 0.05     | -1.40     | -1.00     | 1.40      | RHPN1         | chr8:144534023-144534067 | chr8:144533773-144534097 | Pitta                    |
| A_17_P06536119 | 0.19     | -1.42     | 1.07      | 1.33      | VPS28         | chr8:145620418-145620462 | chr8:145620242-145620522 | Pitta                    |
| A_17_P16250088 | 0.14     | -1.26     | -1.12     | 1.40      | NIPSNAP<br>3B | chr9:106566459-106566503 | chr9:106565993-106566600 | Pitta                    |
| A_17_P06996512 | 0.12     | -1.33     | 1.08      | 1.23      | VAV2          | chr9:135748521-135748565 | chr9:135748282-135748723 | Pitta                    |
| A_17_P16277133 | 0.16     | -1.27     | 1.04      | 1.22      | NOTCH1        | chr9:138522512-138522556 | chr9:138522509-138522722 | Pitta                    |
| A_17_P07012863 | 0.18     | -1.23     | -1.05     | 1.29      | ENTPD8        | chr9:139449475-139449519 | chr9:139449275-139449531 | Pitta                    |
| A_17_P11902586 | 0.20     | -1.20     | -1.45     | 1.73      | PLS3          | chrX:114702099-114702158 | chrX:114701670-114702484 | Pitta                    |
| A_17_P17459458 | 0.09     | -1.44     | 1.14      | 1.26      |               | chrY:18180933-18180977   | chrY:18180718-18180981   | Pitta                    |
| A_17_P15002717 | 0.17     | -1.31     | 1.04      | 1.27      | DAZ2          | chrY:25389269-25389313   | chrY:25389277-25389504   | Pitta                    |
| A_17_P00000918 | 0.15     | -1.51     | 2.55      | -1.69     | C1orf159      | chr1:1041667-1041711     | chr1:1041041-1042308     | Vata                     |
| A_17_P00476257 | 0.17     | -1.04     | 1.36      | -1.31     | NHLH2         | chr1:116182853-116182897 | chr1:116181882-116183887 | Vata                     |
| A_17_P00520487 | 0.16     | 1.05      | 1.20      | -1.25     | UBE2Q1        | chr1:152798232-152798276 | #N/A                     | Vata                     |
| A_17_P15133805 | 0.14     | 1.09      | 1.29      | -1.41     | ARHGEF<br>11  | chr1:155281943-155281987 | chr1:155281773-155282853 | Vata                     |
| A_17_P15133808 | 0.18     | 1.07      | 1.28      | -1.38     | ARHGEF<br>11  | chr1:155282388-155282432 | chr1:155281773-155282853 | Vata                     |
| A_17_P15148753 | 0.16     | 1.18      | 1.17      | -1.37     | KIAA161<br>4  | chr1:179190346-179190390 | #N/A                     | Vata                     |
| A_17_P00836529 | 0.20     | -1.01     | 1.51      | -1.50     |               | chr1:224376687-224376731 | chr1:224375582-224377099 | Vata                     |
| A_17_P15188278 | 0.18     | 1.10      | 1.17      | -1.29     | WNT3A         | chr1:226313367-226313411 | chr1:226313254-226313820 | Vata                     |
| A_17_P15190822 | 0.18     | 1.01      | 1.19      | -1.20     | COG2          | chr1:228845169-228845213 | chr1:228844700-228845216 | Vata                     |

| Probe Name     | p (Corr) | FC K vs P | FC V vs K | FC P vs V | Gene Symbol | Probe Coordinates         | CpG Island                | Prakriti More Methylated |
|----------------|----------|-----------|-----------|-----------|-------------|---------------------------|---------------------------|--------------------------|
| A_17_P00096243 | 0.15     | -1.06     | 1.51      | -1.42     | RUNX3       | chr1:25130037-25130082    | chr1:25128114-25131592    | Vata                     |
| A_17_P15062196 | 0.10     | 1.17      | 1.29      | -1.51     |             | chr1:54726430-54726474    | #N/A                      | Vata                     |
| A_17_P00378169 | 0.15     | 1.43      | 1.10      | -1.57     | GFI1        | chr1:92720692-92720736    | chr1:92718495-92725197    | Vata                     |
| A_17_P07424750 | 0.17     | -1.07     | 1.37      | -1.29     |             | chr10:101271673-101271726 | chr10:101271171-101272106 | Vata                     |
| A_17_P07056470 | 0.12     | 1.15      | 1.18      | -1.35     | GATA3       | chr10:8137972-8138017     | chr10:8131380-8138335     | Vata                     |
| A_17_P08066878 | 0.13     | 1.07      | 1.23      | -1.31     | CBL         | chr11:118582256-118582300 | chr11:118581851-118582487 | Vata                     |
| A_17_P07598567 | 0.14     | 1.09      | 1.23      | -1.34     | BRSK2       | chr11:1387430-1387474     | #N/A                      | Vata                     |
| A_17_P07722805 | 0.14     | 1.08      | 1.33      | -1.44     | KCNA4       | chr11:29994525-29994570   | #N/A                      | Vata                     |
| A_17_P07796099 | 0.08     | 1.28      | 1.14      | -1.47     | DGKZ        | chr11:46310618-46310663   | #N/A                      | Vata                     |
| A_17_P07813513 | 0.16     | 1.04      | 1.23      | -1.28     | RTN4RL2     | chr11:56988832-56988876   | #N/A                      | Vata                     |
| A_17_P07838279 | 0.09     | 1.28      | 1.14      | -1.45     | BAD         | chr11:63793258-63793302   | #N/A                      | Vata                     |
| A_17_P07844041 | 0.09     | 1.16      | 1.21      | -1.41     | MAP3K11     | chr11:65131933-65131977   | #N/A                      | Vata                     |
| A_17_P16585768 | 0.12     | 1.24      | 1.20      | -1.48     | ARL1        | chr12:100325553-100325597 | chr12:100325178-100326284 | Vata                     |
| A_17_P08643060 | 0.16     | 1.23      | 1.11      | -1.36     | FLJ20674    | chr12:117025343-117025388 | #N/A                      | Vata                     |
| A_17_P16602848 | 0.19     | 1.20      | 1.14      | -1.37     |             | chr12:127317263-127317307 | chr12:127316994-127319104 | Vata                     |
| A_17_P09148066 | 0.19     | -1.05     | 1.36      | -1.29     | LAMP1       | chr13:113024165-113024211 | #N/A                      | Vata                     |
| A_17_P16694876 | 0.06     | 1.21      | 1.23      | -1.48     | PAX9        | chr14:36196526-36196570   | chr14:36196537-36198025   | Vata                     |
| A_17_P09369128 | 0.19     | -1.14     | 1.30      | -1.15     | GALNTL1     | chr14:68796561-68796605   | chr14:68796003-68798146   | Vata                     |
| A_17_P09709091 | 0.14     | -1.15     | 1.89      | -1.64     | RPS27L      | chr15:61236701-61236745   | chr15:61236471-61236927   | Vata                     |
| A_17_P09853755 | 0.16     | 1.14      | 1.27      | -1.45     | NR2F2       | chr15:94677097-94677141   | chr15:94674412-94678725   | Vata                     |
| A_17_P09929182 | 0.19     | 1.12      | 1.27      | -1.42     |             | chr16:11797758-11797802   | #N/A                      | Vata                     |
| A_17_P09890597 | 0.16     | 1.07      | 1.32      | -1.42     | NTN2L       | chr16:2463409-2463453     | chr16:2461087-2465930     | Vata                     |
| A_17_P16879782 | 0.13     | 1.16      | 1.10      | -1.28     | FUS         | chr16:31098515-31098559   | chr16:31098321-31099726   | Vata                     |
| A_17_P16899937 | 0.14     | 1.20      | 1.21      | -1.46     | CPNE2       | chr16:55684599-55684643   | chr16:55683545-55684611   | Vata                     |
| A_17_P10048393 | 0.11     | 1.19      | 1.29      | -1.53     |             | chr16:58346589-58346633   | #N/A                      | Vata                     |
| A_17_P16904676 | 0.16     | 1.33      | 1.18      | -1.56     | CDH11       | chr16:63712294-63712338   | chr16:63712157-63715165   | Vata                     |
| A_17_P16920502 | 0.14     | 1.24      | 1.15      | -1.43     | USP10       | chr16:83290852-83290896   | chr16:83290664-83291529   | Vata                     |
| A_17_P10170217 | 0.15     | 1.29      | 1.23      | -1.59     |             | chr16:85088191-85088235   | #N/A                      | Vata                     |
| A_17_P10178117 | 0.19     | -1.05     | 1.31      | -1.26     | ZFPM1       | chr16:87049587-87049631   | chr16:87046230-87050015   | Vata                     |
| A_17_P10305343 | 0.14     | 1.24      | 1.20      | -1.49     | LHX1        | chr17:32367938-32367982   | chr17:32366012-32374988   | Vata                     |
| A_17_P10323687 | 0.17     | 1.12      | 1.20      | -1.35     |             | chr17:37076012-37076057   | #N/A                      | Vata                     |
| A_17_P16938072 | 0.17     | 1.15      | 1.15      | -1.32     | TM4SF5      | chr17:4632710-4632754     | chr17:4632443-4633062     | Vata                     |
| A_17_P10392473 | 0.15     | 1.13      | 1.20      | -1.35     | OR4D1       | chr17:53589241-53589286   | #N/A                      | Vata                     |
| A_17_P16940879 | 0.09     | 1.07      | 1.21      | -1.29     | DNAH2       | chr17:7584440-7584484     | #N/A                      | Vata                     |
| A_17_P10497112 | 0.15     | 1.01      | 1.43      | -1.45     | FOXK2       | chr17:78135453-78135512   | #N/A                      | Vata                     |
| A_17_P10497379 | 0.11     | 1.29      | 1.09      | -1.41     | WDR45L      | chr17:78198551-78198595   | chr17:78198590-78199613   | Vata                     |
| A_17_P10222988 | 0.13     | 1.28      | 1.22      | -1.56     | USP43       | chr17:9489360-9489404     | chr17:9489114-9490341     | Vata                     |
| A_17_P10223507 | 0.18     | 1.09      | 1.20      | -1.31     | DHRS7C      | chr17:9615521-9615565     | #N/A                      | Vata                     |

| Probe Name     | p (Corr) | FC K vs P | FC V vs K | FC P vs V | Gene Symbol   | Probe Coordinates        | CpG Island               | Prakriti More Methylated |
|----------------|----------|-----------|-----------|-----------|---------------|--------------------------|--------------------------|--------------------------|
| A_17_P10888170 | 0.18     | 1.09      | 1.25      | -1.36     | NFIX          | chr19:12986307-12986360  | #N/A                     | Vata                     |
| A_17_P10855951 | 0.07     | 1.03      | 1.23      | -1.27     | BTBD2         | chr19:1944329-1944373    | #N/A                     | Vata                     |
| A_17_P17098918 | 0.14     | 1.18      | 1.15      | -1.36     | GIPC3         | chr19:3536846-3536890    | chr19:3536357-3536947    | Vata                     |
| A_17_P17091498 | 0.17     | 1.14      | 1.17      | -1.33     | SHC2          | chr19:373110-373154      | chr19:373147-373629      | Vata                     |
| A_17_P10865529 | 0.16     | 1.18      | 1.12      | -1.32     | JMJD2B        | chr19:5027923-5027967    | #N/A                     | Vata                     |
| A_17_P10975722 | 0.12     | 1.05      | 1.31      | -1.37     | DMPK          | chr19:50966235-50966279  | chr19:50962539-50967007  | Vata                     |
| A_17_P10983703 | 0.16     | -1.08     | 1.26      | -1.17     | GRWD1         | chr19:53647740-53647784  | #N/A                     | Vata                     |
| A_17_P17152528 | 0.10     | 1.27      | 1.13      | -1.43     | SLC17A7       | chr19:54629127-54629171  | #N/A                     | Vata                     |
| A_17_P10996520 | 0.18     | 1.22      | 1.11      | -1.35     | ZNF320        | chr19:58092228-58092272  | #N/A                     | Vata                     |
| A_17_P10851888 | 0.16     | 1.26      | 1.19      | -1.50     | KISS1R        | chr19:870293-870337      | chr19:868034-871787      | Vata                     |
| A_17_P01402648 | 0.09     | -1.08     | 1.45      | -1.34     | BCL2L11       | chr2:111595110-111595154 | chr2:111591677-111597436 | Vata                     |
| A_17_P01433015 | 0.14     | 1.18      | 1.17      | -1.38     |               | chr2:119485563-119485607 | #N/A                     | Vata                     |
| A_17_P15383296 | 0.18     | 1.15      | 1.15      | -1.33     | ARPC2         | chr2:218790220-218790264 | chr2:218789898-218790277 | Vata                     |
| A_17_P01965004 | 0.11     | 1.04      | 1.29      | -1.35     | NGEF          | chr2:233474291-233474335 | chr2:233474093-233474363 | Vata                     |
| A_17_P02007683 | 0.20     | 1.16      | 1.17      | -1.36     |               | chr2:242129619-242129663 | chr2:242129117-242130491 | Vata                     |
| A_17_P01246053 | 0.14     | 1.14      | 1.18      | -1.34     | MEIS1         | chr2:66662181-66662225   | chr2:66662072-66662908   | Vata                     |
| A_17_P01279947 | 0.09     | 1.12      | 1.41      | -1.58     | BOLA3         | chr2:74228236-74228280   | #N/A                     | Vata                     |
| A_17_P17194412 | 0.17     | 1.10      | 1.13      | -1.24     | KCNK15        | chr20:42812144-42812188  | chr20:42812082-42812852  | Vata                     |
| A_17_P11328864 | 0.19     | 1.10      | 1.12      | -1.24     | ADAMTS1       | chr21:27139853-27139897  | chr21:27138429-27139988  | Vata                     |
| A_17_P11436538 | 0.16     | 1.20      | 1.23      | -1.47     | PPIL2         | chr22:20341644-20341688  | chr22:20341565-20342516  | Vata                     |
| A_17_P11458450 | 0.14     | -1.13     | 1.47      | -1.30     |               | chr22:26365187-26365231  | chr22:26364987-26365310  | Vata                     |
| A_17_P15483610 | 0.17     | 1.13      | 1.17      | -1.33     | OSBPL11       | chr3:126797105-126797149 | chr3:126796673-126797296 | Vata                     |
| A_17_P15608440 | 0.12     | 1.07      | 1.20      | -1.28     | PDE5A         | chr4:120769369-120769413 | chr4:120767651-120769698 | Vata                     |
| A_17_P02890618 | 0.19     | 1.17      | 1.13      | -1.32     | SLBP          | chr4:1682969-1683013     | #N/A                     | Vata                     |
| A_17_P03045453 | 0.08     | 1.16      | 1.26      | -1.47     | RELL1         | chr4:37364557-37364601   | chr4:37363796-37365008   | Vata                     |
| A_17_P15582787 | 0.11     | 1.21      | 1.17      | -1.42     | DKFZP564O0823 | chr4:76078358-76078402   | chr4:76077324-76078955   | Vata                     |
| A_17_P03191580 | 0.20     | -1.12     | 1.27      | -1.14     | G3BP2         | chr4:76816875-76816919   | chr4:76816659-76817944   | Vata                     |
| A_17_P15729201 | 0.18     | 1.11      | 1.44      | -1.59     | EFNA5         | chr5:107035013-107035057 | chr5:107033029-107036090 | Vata                     |
| A_17_P03716472 | 0.12     | -1.12     | 1.76      | -1.57     |               | chr5:2060871-2060915     | chr5:2060315-2060879     | Vata                     |
| A_17_P04030065 | 0.20     | 1.09      | 1.35      | -1.48     | ZBED3         | chr5:76418965-76419024   | #N/A                     | Vata                     |
| A_17_P04109493 | 0.18     | 1.04      | 1.19      | -1.23     | NR2F1         | chr5:92942625-92942669   | chr5:92940526-92943093   | Vata                     |
| A_17_P15863433 | 0.16     | 1.12      | 1.22      | -1.37     | EYA4          | chr6:133604893-133604937 | chr6:133603779-133605279 | Vata                     |
| A_17_P05146839 | 0.11     | 1.29      | 1.16      | -1.51     | SHPRH         | chr6:146326796-146326840 | chr6:146326488-146327394 | Vata                     |
| A_17_P05164207 | 0.13     | 1.08      | 1.31      | -1.41     | ZC3H12D       | chr6:149819859-149819909 | chr6:149819485-149819882 | Vata                     |
| A_17_P15888696 | 0.20     | 1.02      | 1.24      | -1.27     | RPS6KA2       | chr6:166960688-166960732 | chr6:166959952-166961669 | Vata                     |
| A_17_P04818976 | 0.19     | 1.22      | 1.17      | -1.43     | EEF1A1        | chr6:74290271-74290315   | #N/A                     | Vata                     |
| A_17_P15838736 | 0.13     | -1.13     | 1.74      | -1.54     | RRAGD         | chr6:90178308-90178352   | chr6:90177593-90179089   | Vata                     |
| A_17_P05647572 | 0.13     | 1.13      | 1.19      | -1.35     | PCOLCE        | chr7:100039906-100039950 | chr7:100039550-100041588 | Vata                     |

| Probe Name     | p (Corr) | FC K vs P | FC V vs K | FC P vs V | Gene Symbol | Probe Coordinates         | CpG Island                | Prakriti More Methylated |
|----------------|----------|-----------|-----------|-----------|-------------|---------------------------|---------------------------|--------------------------|
| A_17_P16038423 | 0.20     | -1.02     | 1.28      | -1.25     | CENTG3      | chr7:150414936-150414980  | chr7:150414413-150415973  | Vata                     |
| A_17_P05264209 | 0.16     | -1.04     | 1.56      | -1.50     | MAD1L1      | chr7:1851970-1852014      | #N/A                      | Vata                     |
| A_17_P05277983 | 0.16     | 1.14      | 1.37      | -1.56     | TNRC18      | chr7:5429732-5429777      | chr7:5425029-5435782      | Vata                     |
| A_17_P16122483 | 0.16     | 1.16      | 1.25      | -1.44     | RIMS2       | chr8:104580687-104580731  | chr8:104580046-104583089  | Vata                     |
| A_17_P16150180 | 0.19     | 1.24      | 1.10      | -1.37     | KIFC2       | chr8:145669090-145669134  | chr8:145668687-145669592  | Vata                     |
| A_17_P16087694 | 0.14     | 1.21      | 1.18      | -1.43     | DDHD2       | chr8:38208922-38208966    | chr8:38207892-38209113    | Vata                     |
| A_17_P06095618 | 0.18     | 1.03      | 1.28      | -1.32     | SLC20A2     | chr8:42516359-42516406    | #N/A                      | Vata                     |
| A_17_P16101526 | 0.19     | -1.07     | 1.34      | -1.25     | CYP7B1      | chr8:65873654-65873698    | chr8:65873544-65874276    | Vata                     |
| A_17_P06925033 | 0.18     | -1.04     | 1.39      | -1.34     | ASTN2       | chr9:119215732-119215778  | chr9:119215074-119217317  | Vata                     |
| A_17_P06965577 | 0.14     | 1.19      | 1.21      | -1.44     | LMX1B       | chr9:128412573-128412617  | chr9:128412558-128417927  | Vata                     |
| A_17_P16267381 | 0.15     | -1.15     | 1.30      | -1.13     | USP20       | chr9:131676727-131676771  | chr9:131676607-131677042  | Vata                     |
| A_17_P16269977 | 0.16     | 1.12      | 1.16      | -1.30     | BARHL1      | chr9:134446985-134447029  | chr9:134444985-134448407  | Vata                     |
| A_17_P07007311 | 0.18     | 1.19      | 1.15      | -1.36     | C9orf69     | chr9:138154350-138154394  | #N/A                      | Vata                     |
| A_17_P07014509 | 0.18     | -1.05     | 1.28      | -1.22     | CACNA1B     | chr9:139896936-139896980  | chr9:139896952-139897228  | Vata                     |
| A_17_P06755157 | 0.18     | -1.04     | 1.35      | -1.29     | GNA14       | chr9:79452440-79452484    | chr9:79452266-79453521    | Vata                     |
| A_17_P06830103 | 0.16     | 1.16      | 1.31      | -1.52     | FANCC       | chr9:97120060-97120119    | #N/A                      | Vata                     |
| A_17_P11973292 | 0.15     | -1.05     | 1.33      | -1.26     | TMEM32      | chrX:134883586-134883630  | chrX:134883337-134883824  | Vata                     |
| A_17_P12022540 | 0.18     | 1.20      | 1.07      | -1.28     |             | chrX:149280672-149280716  | chrX:149280198-149284748  | Vata                     |
| A_17_P11635969 | 0.18     | 1.16      | 1.16      | -1.34     | SMS         | chrX:21868429-21868473    | #N/A                      | Vata                     |
| A_17_P11644240 | 0.18     | 1.18      | 1.19      | -1.40     | APOO        | chrX:23835445-23835501    | #N/A                      | Vata                     |
| A_17_P11713525 | 0.11     | 1.06      | 1.23      | -1.30     |             | chrX:39890124-39890168    | chrX:39889984-39892010    | Vata                     |
| A_17_P11741961 | 0.15     | 1.29      | 1.16      | -1.50     | PCSK1N      | chrX:48575703-48575747    | chrX:48574533-48575771    | Vata                     |
| A_17_P15010312 | 0.19     | 1.27      | 1.15      | -1.47     | GNB1        | chr1:1811237-1811281      | chr1:1811265-1813132      | Vata                     |
| A_17_P00079016 | 0.17     | 1.03      | 1.34      | -1.38     |             | chr1:20542163-20542207    | chr1:20542153-20542605    | Vata                     |
| A_17_P16309726 | 0.12     | 1.14      | 1.20      | -1.37     | PARD3       | chr10:35143712-35143756   | chr10:35143130-35145249   | Vata                     |
| A_17_P08041135 | 0.13     | 1.13      | 1.34      | -1.51     | USP28       | chr11:113251783-113251827 | chr11:113251026-113251903 | Vata                     |
| A_17_P08409909 | 0.17     | 1.03      | 1.30      | -1.33     | WIF1        | chr12:63801988-63802032   | chr12:63801145-63802130   | Vata                     |
| A_17_P16583091 | 0.09     | 1.15      | 1.22      | -1.40     | NTN4        | chr12:94709136-94709180   | chr12:94708004-94709330   | Vata                     |
| A_17_P10494646 | 0.17     | -1.21     | 1.62      | -1.34     | ASPSR1      | chr17:77545486-77545530   | chr17:77545430-77545783   | Vata                     |
| A_17_P01899846 | 0.16     | 1.20      | 1.15      | -1.38     | IHH         | chr2:219631194-219631238  | chr2:219630398-219631374  | Vata                     |
| A_17_P11157507 | 0.19     | 1.16      | 1.15      | -1.34     |             | chr20:36708427-36708471   | chr20:36708105-36708548   | Vata                     |
| A_17_P17259018 | 0.15     | 1.15      | 1.21      | -1.39     | SCARF2      | chr22:19121087-19121131   | chr22:19120638-19122665   | Vata                     |
| A_17_P15439286 | 0.12     | -1.00     | 1.40      | -1.40     | GLT8D1      | chr3:52715167-52715211    | chr3:52714577-52715466    | Vata                     |
| A_17_P15439957 | 0.18     | 1.07      | 1.15      | -1.22     | CACNA1D     | chr3:53502949-53502993    | chr3:53502967-53505146    | Vata                     |
| A_17_P05180076 | 0.18     | 1.13      | 1.16      | -1.31     | FBXO5       | chr6:153345341-153345385  | chr6:153345101-153346666  | Vata                     |
| A_17_P06511769 | 0.16     | -1.03     | 1.30      | -1.26     | COL22A1     | chr8:139959531-139959575  | chr8:139959063-139959629  | Vata                     |
| A_17_P17323405 | 0.16     | -1.12     | 1.30      | -1.16     | SCML2       | chrX:18282590-18282634    | chrX:18281818-18283069    | Vata                     |
| A_17_P15191185 | 0.13     | 1.16      | 1.18      | -1.37     | TRIM67      | chr1:229363607-229363651  | chr1:229363182-229363968  | Vata                     |

| Probe Name     | p (Corr) | FC K vs P | FC V vs K | FC P vs V | Gene Symbol | Probe Coordinates         | CpG Island                | Prakriti More Methylated |
|----------------|----------|-----------|-----------|-----------|-------------|---------------------------|---------------------------|--------------------------|
| A_17_P15201854 | 0.12     | 1.27      | 1.14      | -1.45     | AKT3        | chr1:242079337-242079381  | chr1:242079335-242079868  | Vata                     |
| A_17_P00022558 | 0.15     | -1.22     | 1.37      | -1.12     | CHD5        | chr1:6111653-6111697      | chr1:6111460-6111707      | Vata                     |
| A_17_P16456617 | 0.19     | 1.24      | 1.15      | -1.43     | MS4A13      | chr11:60039525-60039569   | chr11:60039359-60039621   | Vata                     |
| A_17_P16407122 | 0.10     | -1.20     | 1.47      | -1.22     | RPLP2       | chr11:799931-799975       | chr11:799202-800509       | Vata                     |
| A_17_P16588950 | 0.18     | 1.20      | 1.14      | -1.36     | CKAP4       | chr12:105166389-105166433 | chr12:105165010-105166504 | Vata                     |
| A_17_P16600578 | 0.18     | 1.13      | 1.22      | -1.37     | NCOR2       | chr12:123569412-123569456 | chr12:123569170-123569435 | Vata                     |
| A_17_P16536936 | 0.18     | 1.10      | 1.24      | -1.36     | STRAP       | chr12:15926712-15926756   | chr12:15926198-15927103   | Vata                     |
| A_17_P08266542 | 0.15     | 1.21      | 1.22      | -1.47     | MRPS35      | chr12:27755183-27755227   | chr12:27754900-27755348   | Vata                     |
| A_17_P16555929 | 0.19     | 1.06      | 1.22      | -1.30     | ARF3        | chr12:47637333-47637377   | chr12:47637106-47637654   | Vata                     |
| A_17_P16561981 | 0.18     | 1.08      | 1.19      | -1.29     | DNAJC14     | chr12:54510420-54510464   | chr12:54510053-54510579   | Vata                     |
| A_17_P16584560 | 0.18     | 1.38      | 1.06      | -1.47     | ANKS1B      | chr12:97812635-97812679   | chr12:97812353-97813505   | Vata                     |
| A_17_P16695793 | 0.17     | 1.17      | 1.10      | -1.28     | CLEC14A     | chr14:37795067-37795111   | chr14:37794005-37795288   | Vata                     |
| A_17_P16707602 | 0.14     | 1.11      | 1.15      | -1.27     | PPM1A       | chr14:59785909-59785953   | chr14:59785118-59786512   | Vata                     |
| A_17_P16718560 | 0.12     | 1.20      | 1.07      | -1.29     | C14orf4     | chr14:76569729-76569773   | chr14:76569457-76569777   | Vata                     |
| A_17_P09820204 | 0.11     | 1.62      | 1.68      | -2.73     |             | chr15:87703760-87703804   | chr15:87702918-87703789   | Vata                     |
| A_17_P17002498 | 0.10     | 1.19      | 1.15      | -1.37     | C17orf64    | chr17:55853506-55853550   | chr17:55853493-55854114   | Vata                     |
| A_17_P16939971 | 0.16     | 1.14      | 1.14      | -1.30     | SLC16A13    | chr17:6880291-6880335     | chr17:6879861-6880814     | Vata                     |
| A_17_P16940799 | 0.18     | 1.01      | 1.23      | -1.24     | ATP1B2      | chr17:7495453-7495497     | chr17:7494864-7496063     | Vata                     |
| A_17_P17040620 | 0.13     | 1.03      | 1.20      | -1.23     | SLMO1       | chr18:12410847-12410891   | chr18:12410135-12410863   | Vata                     |
| A_17_P10887678 | 0.15     | 1.63      | 1.30      | -2.12     | DNASE2      | chr19:12853345-12853389   | chr19:12852690-12853508   | Vata                     |
| A_17_P17095719 | 0.14     | 1.12      | 1.18      | -1.33     | KLF16       | chr19:1808254-1808298     | chr19:1807725-1808443     | Vata                     |
| A_17_P10858284 | 0.15     | 1.03      | 1.25      | -1.29     | DIRAS1      | chr19:2674338-2674382     | chr19:2674168-2674390     | Vata                     |
| A_17_P10850641 | 0.17     | -1.19     | 1.30      | -1.09     | MADCAM1     | chr19:449083-449127       | chr19:448799-449135       | Vata                     |
| A_17_P01432349 | 0.13     | 1.17      | 1.14      | -1.33     | EN1         | chr2:119323218-119323262  | chr2:119323039-119323296  | Vata                     |
| A_17_P15208304 | 0.12     | 1.14      | 1.26      | -1.44     | SNTG2       | chr2:936346-936390        | chr2:935686-936774        | Vata                     |
| A_17_P01352412 | 0.15     | 1.14      | 1.13      | -1.30     | TSGA10      | chr2:99124068-99124112    | chr2:99123787-99124652    | Vata                     |
| A_17_P01352586 | 0.12     | 1.04      | 1.27      | -1.33     | MITD1       | chr2:99163875-99163920    | chr2:99163780-99164055    | Vata                     |
| A_17_P11028038 | 0.17     | 1.15      | 1.14      | -1.31     | SMOX        | chr20:4078248-4078292     | chr20:4077482-4078412     | Vata                     |
| A_17_P11531364 | 0.14     | -1.02     | 1.33      | -1.31     | GTSE1       | chr22:45106070-45106114   | chr22:45106042-45106367   | Vata                     |
| A_17_P02075053 | 0.18     | 1.17      | 1.15      | -1.34     | NR2C2       | chr3:14964861-14964905    | chr3:14964490-14964988    | Vata                     |
| A_17_P15533063 | 0.14     | 1.07      | 1.15      | -1.23     |             | chr4:1392265-1392309      | chr4:1392197-1392435      | Vata                     |
| A_17_P15584344 | 0.08     | 1.26      | 1.12      | -1.40     | FRAS1       | chr4:79198114-79198158    | chr4:79197389-79198280    | Vata                     |
| A_17_P15530163 | 0.15     | 1.23      | 1.11      | -1.37     | ZNF718      | chr4:97528-97572          | chr4:97146-97898          | Vata                     |
| A_17_P04385223 | 0.18     | 1.28      | 1.16      | -1.49     | HAND1       | chr5:153835959-153836003  | chr5:153835383-153836321  | Vata                     |
| A_17_P04416265 | 0.18     | 1.17      | 1.24      | -1.45     | GABRB2      | chr5:160907816-160907862  | chr5:160907270-160907962  | Vata                     |
| A_17_P04033238 | 0.18     | 1.26      | 1.07      | -1.35     | TBCA        | chr5:77108055-77108099    | chr5:77107401-77108059    | Vata                     |
| A_17_P04561149 | 0.20     | 1.02      | 1.25      | -1.27     | PHACTR1     | chr6:12857882-12857926    | chr6:12857863-12858485    | Vata                     |
| A_17_P04628008 | 0.18     | 1.05      | 1.17      | -1.23     | PRSS16      | chr6:27336114-27336158    | chr6:27336079-27336343    | Vata                     |

| Probe Name     | p<br>(Corr) | FC<br>K vs P | FC<br>V vs K | FC<br>P vs V | Gene<br>Symbol | Probe Coordinates        | CpG Island               | Prakriti More<br>Methylated |
|----------------|-------------|--------------|--------------|--------------|----------------|--------------------------|--------------------------|-----------------------------|
| A_17_P15799342 | 0.13        | 1.17         | 1.18         | -1.38        | KIAA194<br>9   | chr6:30762556-30762600   | chr6:30762371-30762913   | Vata                        |
| A_17_P15810223 | 0.20        | 1.10         | 1.17         | -1.28        | TRERF1         | chr6:42527631-42527677   | chr6:42527488-42527721   | Vata                        |
| A_17_P16017219 | 0.12        | 1.17         | 1.12         | -1.31        | IRF5           | chr7:128365676-128365720 | chr7:128365054-128365992 | Vata                        |
| A_17_P05779911 | 0.18        | 1.10         | 1.20         | -1.32        | KIAA026<br>5   | chr7:129497455-129497510 | chr7:129497328-129497729 | Vata                        |
| A_17_P16038488 | 0.08        | 1.25         | 1.18         | -1.48        | CENTG3         | chr7:150451141-150451185 | chr7:150450852-150451697 | Vata                        |
| A_17_P05373122 | 0.15        | 1.12         | 1.14         | -1.27        | HNRNPA<br>2B1  | chr7:26207162-26207206   | chr7:26205943-26208587   | Vata                        |
| A_17_P15920322 | 0.18        | 1.11         | 1.16         | -1.28        | EVX1           | chr7:27241906-27241950   | chr7:27241580-27242151   | Vata                        |
| A_17_P15922176 | 0.17        | 1.16         | 1.07         | -1.23        |                | chr7:29691929-29691973   | chr7:29690713-29691961   | Vata                        |
| A_17_P05276154 | 0.15        | 1.30         | 1.16         | -1.51        | FOXK1          | chr7:4731654-4731698     | chr7:4731210-4731778     | Vata                        |
| A_17_P16264995 | 0.18        | -1.20        | 1.52         | -1.27        | FPGS           | chr9:129605055-129605099 | chr9:129604684-129605387 | Vata                        |
| A_17_P07009040 | 0.13        | -1.08        | 1.36         | -1.27        | NOTCH1         | chr9:138524000-138524044 | chr9:138523890-138524247 | Vata                        |
| A_17_P06702424 | 0.16        | -1.10        | 1.37         | -1.24        | GNE            | chr9:36248436-36248480   | chr9:36248170-36248886   | Vata                        |
| A_17_P16244144 | 0.11        | 1.07         | 1.22         | -1.31        | ERCC6L2        | chr9:97824117-97824161   | chr9:97823037-97824185   | Vata                        |
| A_17_P12053580 | 0.17        | 1.08         | 1.21         | -1.31        | NLGN4Y         | chrY:15146002-15146046   | chrY:15145684-15146385   | Vata                        |

**'P(corr)' is the Benjamini Hotchberg FDR corrected P-value, 'FC' is the fold change difference**
