# Supplementary material for: DNA methylation analysis of phenotype specific stratified Indian population
Source: PubMed Central journal article supplement (PMC4438459; doi:10.1186/s12967-015-0506-0), 2015-05-08
Supplement: 12967_2015_506_MOESM10_ESM.pdf [file 12967_2015_506_MOESM10_ESM.pdf]

**Table S3: Enrichment analysis of 501 differential methylated prakriti specific regions (mPSR) for genomic context and histone occupancy.**

| <b>Overall Distribution</b> |                      |                              |                        |                   |
|-----------------------------|----------------------|------------------------------|------------------------|-------------------|
| <b>#501</b>                 | <b>No of Feature</b> | <b>Features in the array</b> | <b>Chi-square Test</b> |                   |
|                             |                      |                              | <b>P-value</b>         | <b>Odds Ratio</b> |
| <b>Upstream Promoter</b>    | 21                   | 5360                         | 0.04                   | 1.55              |
| <b>Promoter</b>             | 75                   | 49331                        | <0.0001                | 0.73              |
| <b>5'UTR</b>                | 36                   | 19790                        | 0.06                   | 0.69              |
| <b>Gene Body</b>            | 301                  | 99219                        | 0.009                  | 1.2               |
| <b>3'UTR</b>                | 19                   | 3967                         | 0.005                  | 1.01              |
| <b>Downstream</b>           | 17                   | 9083                         | 0.23                   | 0.62              |
| <b>Non-Intergenic</b>       | 32                   | 12649                        | 0.97                   | 0.97              |
| <b>CpG Island Context</b>   |                      |                              |                        |                   |
| <b>Upstream Promoter</b>    | 17                   | 4397                         | 0.09                   | 1.5               |
| <b>Promoter</b>             | 67                   | 40871                        | 0.0005                 | 0.63              |
| <b>5'UTR</b>                | 34                   | 18469                        | 0.058                  | 0.71              |
| <b>Gene Body</b>            | 256                  | 81611                        | 0.012                  | 1.21              |
| <b>3'UTR</b>                | 16                   | 3097                         | 0.0054                 | 2                 |
| <b>Downstream</b>           | 12                   | 7402                         | 0.111                  | 0.62              |
| <b>Non-Intergenic</b>       | 25                   | 9979                         | 0.89                   | 0.97              |
| <b>CpG shore context</b>    |                      |                              |                        |                   |
| <b>Upstream Promoter</b>    | 4                    | 963                          | 0.21                   | 1.5               |
| <b>Promoter</b>             | 8                    | 8460                         | 0.01                   | 0.63              |
| <b>5'UTR</b>                | 2                    | 1321                         | 0.59                   | 0.71              |
| <b>Gene Body</b>            | 45                   | 17608                        | 0.43                   | 1.21              |
| <b>3'UTR</b>                | 3                    | 870                          | 0.44                   | 2                 |
| <b>Downstream</b>           | 5                    | 1681                         | 0.03                   | 0.62              |
| <b>Non-Intergenic</b>       | 7                    | 2670                         | 0.66                   | 0.97              |
