# Supplementary material for: DNA methylation analysis of phenotype specific stratified Indian population
Source: PubMed Central journal article supplement (PMC4438459; doi:10.1186/s12967-015-0506-0), 2015-05-08
Supplement: 12967_2015_506_MOESM11_ESM.pdf [file 12967_2015_506_MOESM11_ESM.pdf]

**Table S4: Overall Enrichment for mPSRs in ENCODE regions**

| Regions             | # Features of mPSRs | # Features of Agilent 244K | Chi-Square Test |            |                        |
|---------------------|---------------------|----------------------------|-----------------|------------|------------------------|
|                     |                     |                            | P-value         | Odds Ratio | FDR(Corrected p-value) |
| H3K9ac              | 274                 | 154700                     | <0.0001         | 0.75       | 0.0002                 |
| H3K27ac             | 203                 | 129540                     | <0.0001         | 0.75       | 0.0002                 |
| H3H4me1             | 344                 | 168840                     | 0.0031          | 0.85       | 0.0062                 |
| H3K4me2             | 320                 | 174521                     | <0.0001         | 0.78       | 0.0002                 |
| H3K4me3             | 286                 | 166666                     | <0.0001         | 0.73       | 0.0002                 |
| H3K9me1             | 361                 | 144508                     | 0.9611          | 0.96       | 0.9961                 |
| H3K20me1            | 467                 | 184525                     | 0.936           | 0.99       | 0.9961                 |
| H3K27me3            | 371                 | 152724                     | 0.6472          | 0.95       | 0.3208                 |
| H3K36me3            | 340                 | 135609                     | 0.9961          | 1.03       | 0.9961                 |
| Polycomb repression | 180                 | 64857                      | 0.2717          | 1.03       | 0.4075                 |
| CTCF                | 139                 | 72387                      | 0.0057          | 0.78       | 0.0097                 |
| DNAseI              | 124                 | 85540                      | <0.0001         | 0.63       | 0.0002                 |
