# Supplementary material for: DNA methylation analysis of phenotype specific stratified Indian population
Source: PubMed Central journal article supplement (PMC4438459; doi:10.1186/s12967-015-0506-0), 2015-05-08
Supplement: 12967_2015_506_MOESM13_ESM.pdf [file 12967_2015_506_MOESM13_ESM.pdf]

#3989

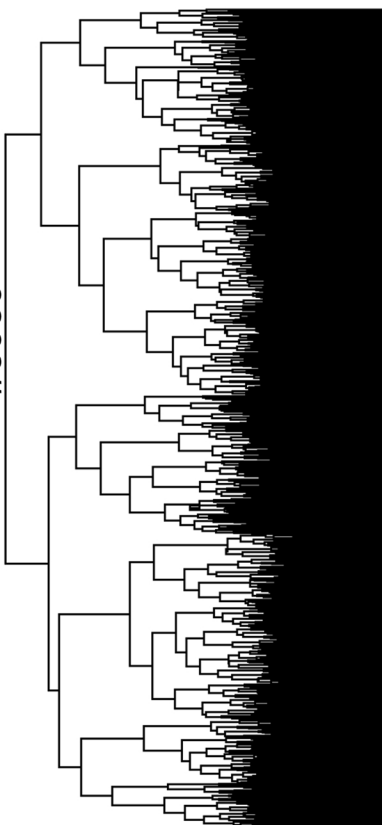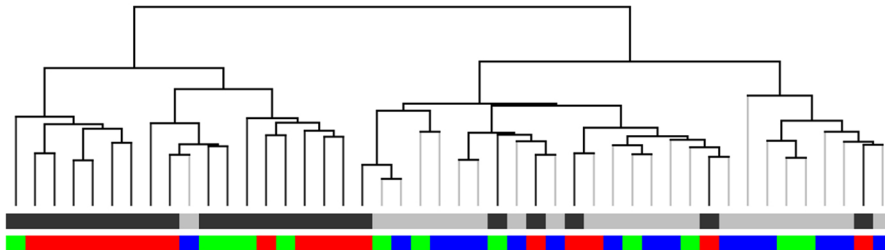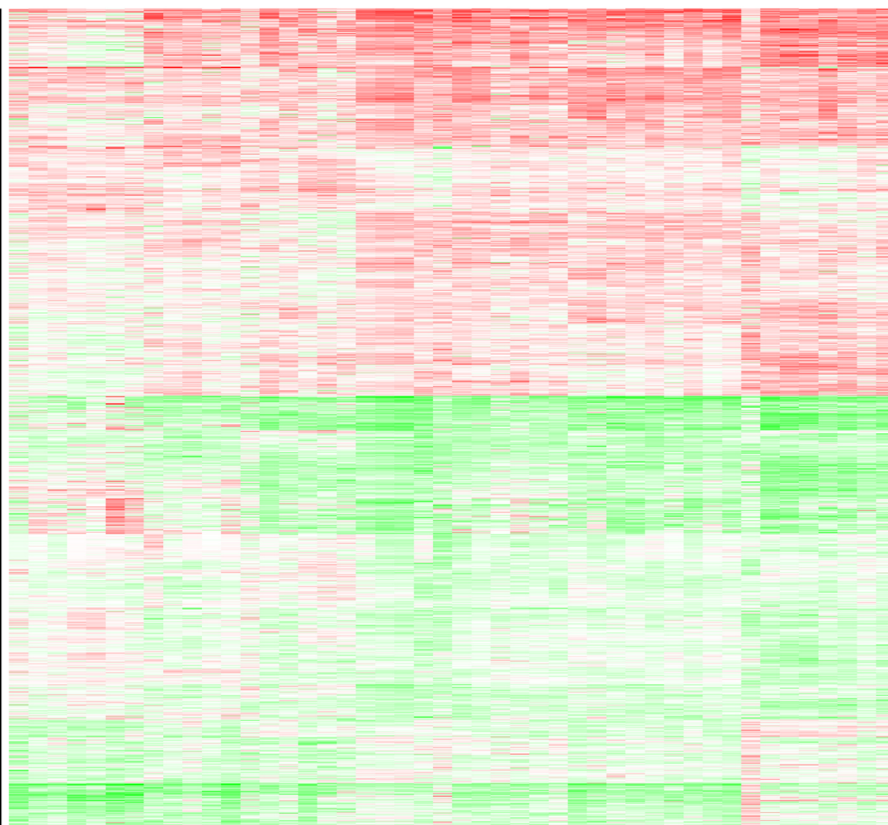

Low  
Methylation  
High

■ Kapha ■ Pitta ■ Vata ■ High BMI ■ Low BMI
