# Supplementary material for: DNA methylation analysis of phenotype specific stratified Indian population
Source: PubMed Central journal article supplement (PMC4438459; doi:10.1186/s12967-015-0506-0), 2015-05-08
Supplement: 12967_2015_506_MOESM14_ESM.pdf [file 12967_2015_506_MOESM14_ESM.pdf]

**Table S5: Gene ontology and pathway analysis of prakriti methylated genes.**

| <b>Prakriti/Cluster/Category and Term</b>                               | <b>Count</b> | <b>%</b> | <b>P-Value</b> | <b>Fold Enrichment</b> |
|-------------------------------------------------------------------------|--------------|----------|----------------|------------------------|
| <b>Kapha Prakriti</b>                                                   |              |          |                |                        |
| <b>Annotation Cluster 1: Enrichment Score: 1.83; Biological Process</b> |              |          |                |                        |
| GO:0046907~intracellular transport                                      | 5            | 25.00    | 9.78E-03       | 5.41                   |
| GO:0006913~nucleocytoplasmic transport                                  | 3            | 15.00    | 1.79E-02       | 13.69                  |
| GO:0051169~nuclear transport                                            | 3            | 15.00    | 1.83E-02       | 13.51                  |
| <b>Annotation Cluster 2: Enrichment Score: 1.65; Biological Process</b> |              |          |                |                        |
| GO:0006605~protein targeting                                            | 4            | 20.00    | 2.71E-03       | 13.25                  |
| GO:0046907~intracellular transport                                      | 5            | 25.00    | 9.78E-03       | 5.42                   |
| GO:0006886~intracellular protein transport                              | 4            | 20.00    | 1.26E-02       | 7.61                   |
| GO:0034613~cellular protein localization                                | 4            | 20.00    | 1.62E-02       | 6.93                   |
| GO:0070727~cellular macromolecule localization                          | 4            | 20.00    | 1.65E-02       | 6.88                   |
| GO:0015031~protein transport                                            | 4            | 20.00    | 7.73E-02       | 3.74                   |
| GO:0045184~establishment of protein localization                        | 4            | 20.00    | 7.90E-02       | 3.70                   |
| GO:0008104~protein localization                                         | 4            | 20.00    | 1.09E-01       | 3.23                   |
| <b>Annotation Cluster 3: Enrichment Score: 1.07; Cellular Component</b> |              |          |                |                        |
| GO:0044427~chromosomal part                                             | 3            | 15.00    | 5.70E-02       | 7.10                   |
| GO:0005694~chromosome                                                   | 3            | 15.00    | 7.76E-02       | 5.95                   |
| GO:0043228~non-membrane-bounded organelle                               | 6            | 30.00    | 1.04E-01       | 2.11                   |
| GO:0043232~intracellular non-membrane-bounded organelle                 | 6            | 30.00    | 1.04E-01       | 2.11                   |
| <b>Annotation Cluster 4: Enrichment Score: 0.87; Cellular Component</b> |              |          |                |                        |
| GO:0005578~proteinaceous extracellular matrix                           | 3            | 15.00    | 4.06E-02       | 8.56                   |
| GO:0031012~extracellular matrix                                         | 3            | 15.00    | 4.66E-02       | 7.94                   |
| GO:0044421~extracellular region part                                    | 3            | 15.00    | 2.55E-01       | 2.85                   |
| GO:0005576~extracellular region                                         | 3            | 15.00    | 6.30E-01       | 1.36                   |
| <b>Annotation Cluster 5: Enrichment Score: 0.84; Cellular Component</b> |              |          |                |                        |
| GO:0016337~cell-cell adhesion                                           | 3            | 15.00    | 5.12E-02       | 7.74                   |
| GO:0007155~cell adhesion                                                | 3            | 15.00    | 2.38E-01       | 3.05                   |
| GO:0022610~biological adhesion                                          | 3            | 15.00    | 2.39E-01       | 3.05                   |
| <b>Pitta Prakriti</b>                                                   |              |          |                |                        |
| <b>Annotation Cluster 1: Enrichment Score: 3.09; Cellular Component</b> |              |          |                |                        |
| GO:0044459~plasma membrane part                                         | 49           | 21.49    | 4.46E-06       | 1.91                   |
| GO:0031226~intrinsic to plasma membrane                                 | 25           | 10.96    | 6.47E-03       | 1.77                   |

| <b>Prakriti/Cluster/Category and Term</b>                               | <b>Count</b> | <b>%</b> | <b>P-Value</b> | <b>Fold Enrichment</b> |
|-------------------------------------------------------------------------|--------------|----------|----------------|------------------------|
| GO:0005887~integral to plasma membrane                                  | 23           | 10.09    | 1.83E-02       | 1.66                   |
| <b>Annotation Cluster 2: Enrichment Score: 2.44; Biological Process</b> |              |          |                |                        |
| GO:0030182~neuron differentiation                                       | 19           | 8.33     | 9.28E-06       | 3.45                   |
| GO:0048666~neuron development                                           | 15           | 6.58     | 9.07E-05       | 3.52                   |
| GO:0000904~cell morphogenesis involved in differentiation               | 11           | 4.82     | 9.80E-04       | 3.59                   |
| GO:0000902~cell morphogenesis                                           | 13           | 5.70     | 1.72E-03       | 2.91                   |
| GO:0030030~cell projection organization                                 | 13           | 5.70     | 2.27E-03       | 2.81                   |
| GO:0032989~cellular component morphogenesis                             | 13           | 5.70     | 4.19E-03       | 2.61                   |
| GO:0007409~axonogenesis                                                 | 8            | 3.51     | 1.07E-02       | 3.30                   |
| GO:0048858~cell projection morphogenesis                                | 9            | 3.95     | 1.19E-02       | 2.92                   |
| GO:0032990~cell part morphogenesis                                      | 9            | 3.95     | 1.52E-02       | 2.80                   |
| GO:0031175~neuron projection development                                | 9            | 3.95     | 1.52E-02       | 2.80                   |
| GO:0048667~cell morphogenesis involved in neuron differentiation        | 8            | 3.51     | 1.60E-02       | 3.05                   |
| GO:0048812~neuron projection morphogenesis                              | 8            | 3.51     | 1.76E-02       | 2.99                   |
| GO:0007411~axon guidance                                                | 4            | 1.75     | 1.50E-01       | 2.97                   |
| <b>Annotation Cluster 3: Enrichment Score: 2.15; Biological Process</b> |              |          |                |                        |
| GO:0021537~telencephalon development                                    | 6            | 2.63     | 1.29E-03       | 7.35                   |
| GO:0030900~forebrain development                                        | 8            | 3.51     | 2.98E-03       | 4.19                   |
| GO:0021761~limbic system development                                    | 4            | 1.75     | 7.28E-03       | 9.95                   |
| GO:0021543~pallium development                                          | 4            | 1.75     | 1.96E-02       | 6.92                   |
| GO:0021766~hippocampus development                                      | 3            | 1.32     | 3.04E-02       | 10.85                  |
| <b>Annotation Cluster 4: Enrichment Score: 1.78; Molecular Function</b> |              |          |                |                        |
| GO:0046872~metal ion binding                                            | 70           | 30.70    | 4.38E-03       | 1.32                   |
| GO:0043167~ion binding                                                  | 71           | 31.14    | 5.21E-03       | 1.31                   |
| GO:0043169~cation binding                                               | 70           | 30.70    | 5.61E-03       | 1.31                   |
| GO:0008270~zinc ion binding                                             | 38           | 16.67    | 7.50E-02       | 1.29                   |
| GO:0046914~transition metal ion binding                                 | 43           | 18.86    | 1.23E-01       | 1.21                   |
| <b>Annotation Cluster 5: Enrichment Score: 1.57; Biological process</b> |              |          |                |                        |
| GO:0045665~negative regulation of neuron differentiation                | 4            | 1.75     | 7.94E-03       | 9.65                   |
| GO:0051960~regulation of nervous system development                     | 8            | 3.51     | 1.04E-02       | 3.32                   |
| GO:0060284~regulation of cell development                               | 8            | 3.51     | 1.45E-02       | 3.11                   |
| GO:0050767~regulation of neurogenesis                                   | 7            | 3.07     | 1.79E-02       | 3.36                   |
| GO:0045596~negative regulation of cell differentiation                  | 7            | 3.07     | 5.40E-02       | 2.58                   |
| GO:0045664~regulation of neuron differentiation                         | 5            | 2.19     | 8.53E-02       | 2.99                   |

| <b>Prakriti/Cluster/Category and Term</b>                              | <b>Count</b> | <b>%</b> | <b>P-Value</b> | <b>Fold Enrichment</b> |
|------------------------------------------------------------------------|--------------|----------|----------------|------------------------|
| GO:0045165~cell fate commitment                                        | 5            | 2.19     | 9.65E-02       | 2.86                   |
| <b>Annotation Cluster 6: Enrichment Score: 1.38; KEGG Pathway</b>      |              |          |                |                        |
| hsa04660:T cell receptor signaling pathway                             | 7            | 3.07     | 1.20E-03       | 5.68                   |
| hsa04662:B cell receptor signaling pathway                             | 5            | 2.19     | 9.56E-03       | 5.84                   |
| hsa04650:Natural killer cell mediated cytotoxicity                     | 5            | 2.19     | 6.09E-02       | 3.30                   |
| hsa04722:Neurotrophin signaling pathway                                | 4            | 1.75     | 1.61E-01       | 2.83                   |
| hsa04370:VEGF signaling pathway                                        | 3            | 1.32     | 2.05E-01       | 3.51                   |
| hsa04664:Fc epsilon RI signaling pathway                               | 3            | 1.32     | 2.17E-01       | 3.37                   |
| <b>Annotation Cluster 7:Enrichment Score: 1.37; Molecular function</b> |              |          |                |                        |
| GO:0003700~transcription factor activity                               | 24           | 10.53    | 2.88E-03       | 1.93                   |
| GO:0030528~transcription regulator activity                            | 29           | 12.72    | 2.58E-02       | 1.50                   |
| GO:0003677~DNA binding                                                 | 40           | 17.54    | 3.83E-02       | 1.34                   |
| GO:0043565~sequence-specific DNA binding                               | 14           | 6.14     | 4.57E-02       | 1.80                   |
| GO:0006350~transcription                                               | 35           | 15.35    | 6.41E-02       | 1.33                   |
| GO:0006355~regulation of transcription, DNA-dependent                  | 30           | 13.16    | 7.63E-02       | 1.35                   |
| GO:0051252~regulation of RNA metabolic process                         | 30           | 13.16    | 9.47E-02       | 1.32                   |
| GO:0045449~regulation of transcription                                 | 39           | 17.11    | 1.62E-01       | 1.19                   |
| <b>Vata Prakriti</b>                                                   |              |          |                |                        |
| <b>Annotation Cluster 1:Enrichment Score: 2.57; Molecular Function</b> |              |          |                |                        |
| GO:0043565~sequence-specific DNA binding                               | 17           | 11.64    | 4.45E-05       | 3.31                   |
| GO:0003700~transcription factor activity                               | 21           | 14.38    | 1.57E-04       | 2.54                   |
| GO:0003677~DNA binding                                                 | 35           | 23.97    | 5.37E-04       | 1.77                   |
| GO:0006355~regulation of transcription, DNA-dependent                  | 27           | 18.49    | 3.41E-03       | 1.78                   |
| GO:0051252~regulation of RNA metabolic process                         | 27           | 18.49    | 4.61E-03       | 1.74                   |
| GO:0030528~transcription regulator activity                            | 23           | 15.75    | 6.77E-03       | 1.80                   |
| GO:0006357~regulation of transcription from RNA polymerase II promoter | 13           | 8.90     | 2.06E-02       | 2.09                   |
| GO:0045449~regulation of transcription                                 | 32           | 21.92    | 2.65E-02       | 1.43                   |
| GO:0006350~transcription                                               | 27           | 18.49    | 2.83E-02       | 1.50                   |
| <b>Annotation Cluster 2:Enrichment Score: 1.44; Biological Process</b> |              |          |                |                        |
| GO:0031571~G1 DNA damage checkpoint                                    | 3            | 2.05     | 3.75E-03       | 31.81                  |
| GO:0007093~mitotic cell cycle checkpoint                               | 4            | 2.74     | 5.77E-03       | 10.85                  |
| GO:0031575~G1/S transition checkpoint                                  | 3            | 2.05     | 8.96E-03       | 20.58                  |
| GO:0007346~regulation of mitotic cell cycle                            | 5            | 3.42     | 4.06E-02       | 3.84                   |
| GO:0000075~cell cycle checkpoint                                       | 4            | 2.74     | 4.24E-02       | 5.13                   |
| GO:0000077~DNA damage checkpoint                                       | 3            | 2.05     | 6.27E-02       | 7.29                   |
| GO:0031570~DNA integrity checkpoint                                    | 3            | 2.05     | 7.22E-02       | 6.73                   |

| <b>Prakriti/Cluster/Category and Term</b>                                                 | <b>Count</b> | <b>%</b> | <b>P-Value</b> | <b>Fold Enrichment</b> |
|-------------------------------------------------------------------------------------------|--------------|----------|----------------|------------------------|
| GO:0006974~response to DNA damage stimulus                                                | 7            | 4.79     | 9.83E-02       | 2.19                   |
| GO:0042770~DNA damage response, signal transduction                                       | 3            | 2.05     | 1.48E-01       | 4.37                   |
| GO:0051726~regulation of cell cycle                                                       | 6            | 4.11     | 1.51E-01       | 2.11                   |
| <b>Annotation Cluster 3:Enrichment Score 1.40<br/>Cellular component and KEGG Pathway</b> |              |          |                |                        |
| GO:0005891~voltage-gated calcium channel complex                                          | 3            | 2.05     | 1.19E-02       | 17.79                  |
| GO:0034704~calcium channel complex                                                        | 3            | 2.05     | 1.77E-02       | 14.49                  |
| GO:0034702~ion channel complex                                                            | 5            | 3.42     | 7.05E-02       | 3.18                   |
| hsa04010:MAPK signaling pathway                                                           | 6            | 4.11     | 7.87E-02       | 2.54                   |
| GO:0034703~cation channel complex                                                         | 4            | 2.74     | 7.90E-02       | 3.95                   |
| <b>Annotation Cluster 4:Enrichment Score: 1.37;<br/>Cellular component</b>                |              |          |                |                        |
| GO:0030182~neuron differentiation                                                         | 13           | 8.90     | 3.45E-04       | 3.46                   |
| GO:0048666~neuron development                                                             | 9            | 6.16     | 8.32E-03       | 3.10                   |
| GO:0046658~anchored to plasma membrane                                                    | 3            | 2.05     | 1.19E-02       | 17.79                  |
| GO:0007409~axonogenesis                                                                   | 6            | 4.11     | 2.44E-02       | 3.63                   |
| GO:0000902~cell morphogenesis                                                             | 8            | 5.48     | 3.22E-02       | 2.62                   |
| GO:0048667~cell morphogenesis involved in neuron differentiation                          | 6            | 4.11     | 3.29E-02       | 3.35                   |
| GO:0048812~neuron projection morphogenesis                                                | 6            | 4.11     | 3.52E-02       | 3.29                   |
| GO:0051301~cell division                                                                  | 7            | 4.79     | 4.00E-02       | 2.77                   |
| GO:0032989~cellular component morphogenesis                                               | 8            | 5.48     | 5.26E-02       | 2.35                   |
| GO:0000904~cell morphogenesis involved in differentiation                                 | 6            | 4.11     | 5.71E-02       | 2.87                   |
| GO:0048858~cell projection morphogenesis                                                  | 6            | 4.11     | 5.79E-02       | 2.86                   |
| GO:0007163~establishment or maintenance of cell polarity                                  | 3            | 2.05     | 6.51E-02       | 7.14                   |
| GO:0032990~cell part morphogenesis                                                        | 6            | 4.11     | 6.73E-02       | 2.73                   |
| GO:0031175~neuron projection development                                                  | 6            | 4.11     | 6.73E-02       | 2.73                   |
| GO:0048729~tissue morphogenesis                                                           | 5            | 3.42     | 6.74E-02       | 3.24                   |
| GO:0030030~cell projection organization                                                   | 7            | 4.79     | 9.37E-02       | 2.22                   |
| GO:0031225~anchored to membrane                                                           | 3            | 2.05     | 5.00E-01       | 1.78                   |
| GO:0031226~intrinsic to plasma membrane                                                   | 8            | 5.48     | 8.27E-01       | 0.86                   |
| <b>Annotation Cluster 5:Enrichment Score: 1.35;<br/>Biological Process</b>                |              |          |                |                        |
| GO:0006355~regulation of transcription, DNA-dependent                                     | 27           | 18.49    | 3.41E-03       | 1.78                   |
| GO:0051252~regulation of RNA metabolic process                                            | 27           | 18.49    | 4.61E-03       | 1.74                   |
| GO:0032583~regulation of gene-specific transcription                                      | 6            | 4.11     | 5.69E-03       | 5.22                   |
| GO:0045893~positive regulation of transcription, DNA-dependent                            | 11           | 7.53     | 7.41E-03       | 2.69                   |
| GO:0051254~positive regulation of RNA metabolic process                                   | 11           | 7.53     | 7.84E-03       | 2.67                   |

| <b>Prakriti/Cluster/Category and Term</b>                                                               | <b>Count</b> | <b>%</b> | <b>P-Value</b> | <b>Fold Enrichment</b> |
|---------------------------------------------------------------------------------------------------------|--------------|----------|----------------|------------------------|
| GO:0006357~regulation of transcription from RNA polymerase II promoter                                  | 13           | 8.90     | 2.06E-02       | 2.09                   |
| GO:0045941~positive regulation of transcription                                                         | 11           | 7.53     | 2.18E-02       | 2.27                   |
| GO:0035239~tube morphogenesis                                                                           | 5            | 3.42     | 2.30E-02       | 4.59                   |
| GO:0010628~positive regulation of gene expression                                                       | 11           | 7.53     | 2.61E-02       | 2.21                   |
| GO:0035295~tube development                                                                             | 6            | 4.11     | 3.96E-02       | 3.18                   |
| GO:0045935~positive regulation of nucleobase, nucleoside, nucleotide and nucleic acid metabolic process | 11           | 7.53     | 3.97E-02       | 2.06                   |
| GO:0051173~positive regulation of nitrogen compound metabolic process                                   | 11           | 7.53     | 4.74E-02       | 1.99                   |
| GO:0010557~positive regulation of macromolecule biosynthetic process                                    | 11           | 7.53     | 5.16E-02       | 1.96                   |
| GO:0031328~positive regulation of cellular biosynthetic process                                         | 11           | 7.53     | 6.63E-02       | 1.87                   |
| GO:0009891~positive regulation of biosynthetic process                                                  | 11           | 7.53     | 7.15E-02       | 1.85                   |
| GO:0010604~positive regulation of macromolecule metabolic process                                       | 12           | 8.22     | 1.12E-01       | 1.63                   |
| GO:0043193~positive regulation of gene-specific transcription                                           | 3            | 2.05     | 1.69E-01       | 4.02                   |
| GO:0045944~positive regulation of transcription from RNA polymerase II promoter                         | 6            | 4.11     | 2.08E-01       | 1.89                   |
